# Supplementary material for: An imidazolium-modified chiral rhodium/diamine-functionalized periodic mesoporous organosilica for asymmetric transfer hydrogenation of α-haloketones and benzils in aqueous medium
Source: Royal Society of Chemistry journal article supplement (doi:10.1039/c6gc01589a), 2016-01-01

Supporting Information *for*

**An Imidazolium-Modified Chiral Rhodium/diamine-Functionalized Periodic Mesoporous Organosilica for Asymmetric Transfer Hydrogenation of  $\alpha$ -Haloketones and Benzils in Aqueous Medium**

Feng Zhou, Xiaoying Hu, Ming Gao, Tanyu Cheng\*, Guohua Liu\*

*Key Laboratory of Resource Chemistry of Ministry of Education, Shanghai Key Laboratory of Rare Earth Functional Materials, Shanghai Normal University, Shanghai 200234, P. R. China.*

|              | Content                                                                                                                                                                                                                                                               | Page |
|--------------|-----------------------------------------------------------------------------------------------------------------------------------------------------------------------------------------------------------------------------------------------------------------------|------|
| Experimental | General, characterization, and recycle experiments                                                                                                                                                                                                                    | S2   |
| Figure S1    | FT-IR spectra of <b>3</b> and catalyst <b>5</b>                                                                                                                                                                                                                       | S3   |
| Figure S2    | Asymmetric transfer hydrogenation of aryl-substituted 2-haloketones.                                                                                                                                                                                                  | S4   |
| Figure S3    | Reusability of the catalyst <b>5</b> using 2-bromo-1-phenylethanone as a substrate                                                                                                                                                                                    | S18  |
| Figure S4    | Asymmetric transfer hydrogenation of benzil catalyzed by catalyst <b>5</b> , PMO-supported analog and SBA-supported analog. Reactions were carried out at 40 °C, using 10.0 $\mu$ mol of the catalyst, 5 equiv HCOONa, and at an S/C ratio of 100 in 5.0 mL of water. | S21  |
| Figure S5    | Asymmetric transfer hydrogenation of benzils                                                                                                                                                                                                                          | S22  |
| Table S1     | Reusability of catalyst <b>5</b> for asymmetric transfer hydrogenation of benzil                                                                                                                                                                                      | S29  |
| Figure S6    | Reusability of catalyst <b>5</b> for asymmetric transfer hydrogenation of benzil                                                                                                                                                                                      | S29  |

## Experimental

### 1. General

All experiments, which are sensitive to moisture or air, were carried out under an Ar atmosphere using the standard Schlenk techniques. (*R,R*)-1,2-diphenylenediamine, [Cp\*RhCl<sub>2</sub>]<sub>2</sub>, 1,2-bis(triethoxysilyl)ethane and surfactant P123 (CH<sub>2</sub>-CH<sub>2</sub>O)<sub>20</sub>(CH<sub>2</sub>(CH<sub>3</sub>)CH<sub>2</sub>O)<sub>70</sub>(CH<sub>2</sub>CH<sub>2</sub>O)<sub>20</sub>) were purchased from Sigma-Aldrich Company Ltd. Compounds (*R,R*)-4-(trimethoxysilyl)ethylphenylsulfonyl-1,2-diphenylethylenediamine and 1,3-bis(3-(triethoxysilyl)propyl)-1*H*-imidazol-3-ium iodide (**2**) were synthesized according to the reported literatures [ *J. Mater. Chem.* **2010**, *20*, 1970 and *Tetrahedron* **2008**, *64*, 4637.]

### 2. Characterization

Rh loading amounts in catalysts were analyzed using an inductively coupled plasma optical emission spectrometer (ICP, Varian VISTA-MPX). Fourier transform infrared (FT-IR) spectra were collected on a Nicolet Magna 550 spectrometer using KBr method. Transmission electron microscopy (TEM) images were performed on a JEOL JEM2010 electron microscope at an acceleration voltage of 220 kV. X-ray photoelectron spectroscopy (XPS) measurements were performed on a Perkin-Elmer PHI 5000C ESCA system. A 200 μm diameter spot size was scanned using a monochromatized Aluminum *Kα* X-ray source (1486.6 eV) at 40 W and 15 kV with 58.7 eV pass energies. All the binding energies were calibrated by using the contaminant carbon (C<sub>1s</sub> = 284.6 eV) as a reference. Nitrogen adsorption isotherms were measured at 77 K with a Quantachrome Nova 4000 analyzer. The samples were measured after being outgassed at 423 K overnight. Pore size distributions were calculated by using the BJH model. The specific surface areas (SBET) of samples were determined from the linear parts of BET plots (*p/p*<sub>0</sub> = 0.05-1.00). Solid state NMR experiments were explored on a Bruker AVANCE spectrometer at a magnetic field strength of 9.4 T with <sup>1</sup>H frequency of 400.1 MHz, <sup>13</sup>C frequency of 100.5 MHz and <sup>29</sup>Si frequency of 79.4 MHz with 4 mm rotor at two spinning frequency of 5.5 kHz and 8.0 kHz, TPPM decoupling is applied in the during acquisition period. <sup>1</sup>H cross polarization in all solid state NMR experiments was employed using a contact time of 2 ms and the pulse lengths of 4 μs.

**3. General procedure for the recycle experiments.** The catalyst **5** (215.0 mg, 20.0 μmol of Rh based on the ICP analysis), 2-bromo-phenylethanone or benzil (2.0 mmol), HCO<sub>2</sub>Na (0.68 g, 10.0 mmol), 10.0 mL of water were added sequentially to a 50.0 mL round-bottom flask. The mixture was then stirred at room temperature (40 °C). After completion of the reaction, the catalyst was separated by centrifugation (10,000 rpm). The collected solids was transferred to a fresh 50.0 mL round-bottom flask and 2-bromo-phenylethanone or benzil (2.0 mmol), HCO<sub>2</sub>Na (0.68 g, 10.0 mmol), and

10.0 mL of water were added again for next recycle. The aqueous solution was extracted with ethyl ether ( $3 \times 3.0$  mL). The combined ethyl ether extracts were washed with  $\text{NaHCO}_3$  and brine, and then dehydrated with  $\text{Na}_2\text{SO}_4$ . After evaporation of ethyl ether, the residue was purified by silica gel flash column chromatography to afford the desired products.

**Figure S1.** FT-IR spectra of **3** and catalyst **5**.

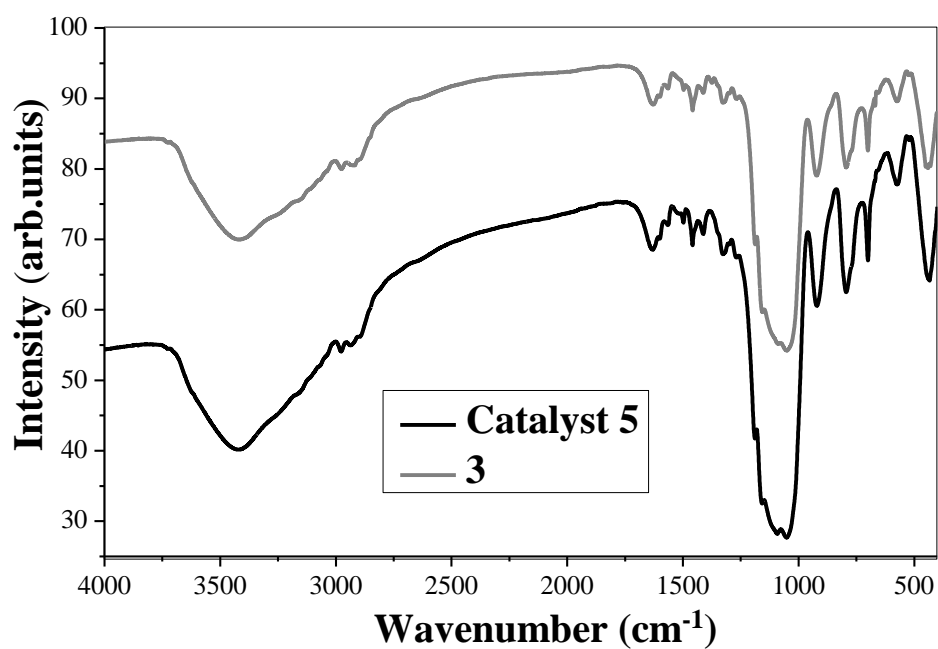

**Figure S2.** Asymmetric transfer hydrogenation of of aryl-substituted 2-haloketones. [The products were analyzed by a HPLC with a UV-Vis detector using a Daicel OB-H or OJ-H chiralcel column (  $\Phi$ 0.46×25 cm)].

***Translation of Chinese to English is as follows:***

| Peak | RetTime [min] | Area     | Area ratio % | Height  |
|------|---------------|----------|--------------|---------|
| 1    | 8.498         | 18644684 | 49.95        | 1331866 |
| 2    | 9.358         | 18683896 | 50.05        | 1150448 |

  

| 名称 | 保留时间 (分钟) | 面积 (微伏·秒) | % 面积  | 高度 (微伏) | 积分类型 | 含量 | 单位 | 峰类型 | 峰代码 | 结构 1 名 | 结构 1 说明 | 结构 1 分子量 | 结构 1 公式 | 结构 1 结构 |
|----|-----------|-----------|-------|---------|------|----|----|-----|-----|--------|---------|----------|---------|---------|
| 1  | 8.498     | 18644684  | 49.95 | 1331866 | VV   |    |    | 未知  |     |        |         |          |         |         |
| 2  | 9.358     | 18683896  | 50.05 | 1150448 | VV   |    |    | 未知  |     |        |         |          |         |         |

**(S)-2-bromo-1-phenylethanol (6a):** (HPLC: Chiralcel OB-H, detected at 215 nm, eluent: n-hexane/2-propanol = 90/10, flow rate = 1 mL/min, 25 °C).

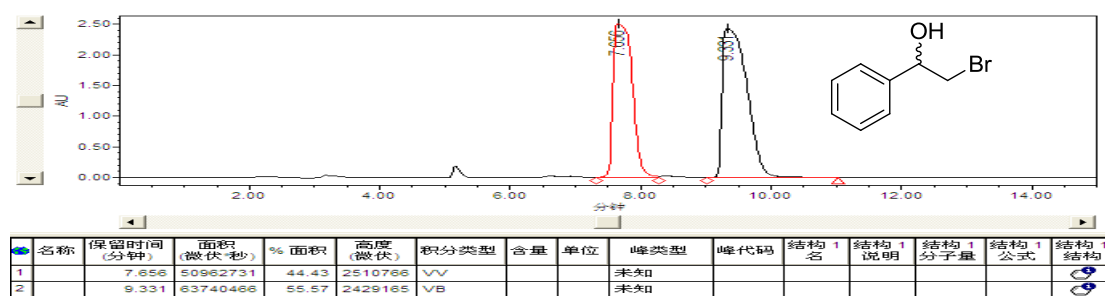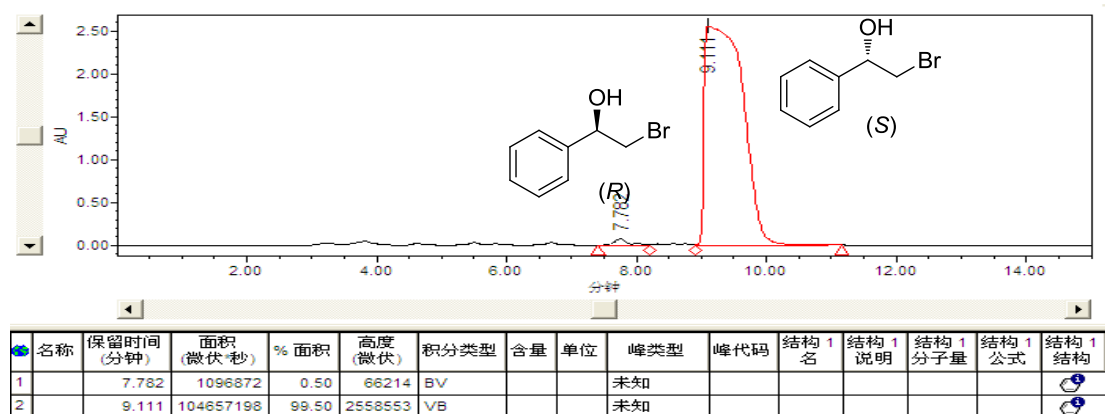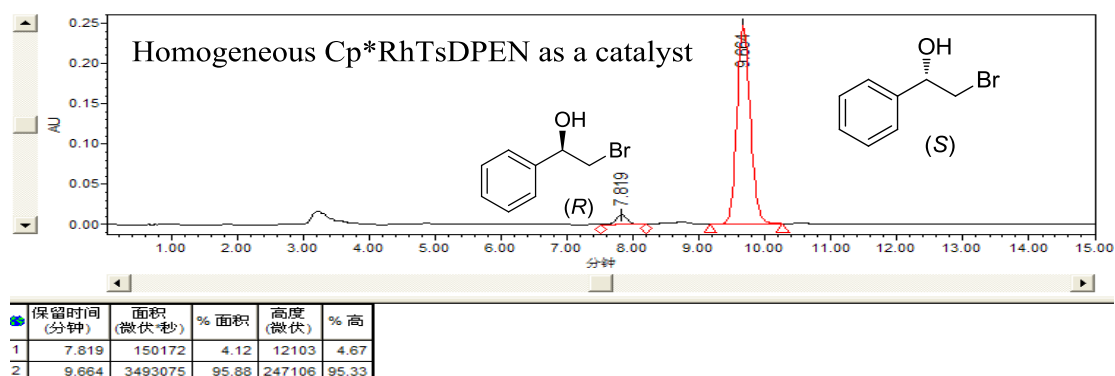

**(S)-2-bromo-1-(4-fluorophenyl)ethanol (6b):** (HPLC: Chiracel OB-H, detected at 215 nm, eluent: n-hexane/2-propanol = 90/10, flow rate = 1 mL/min, 25 °C).

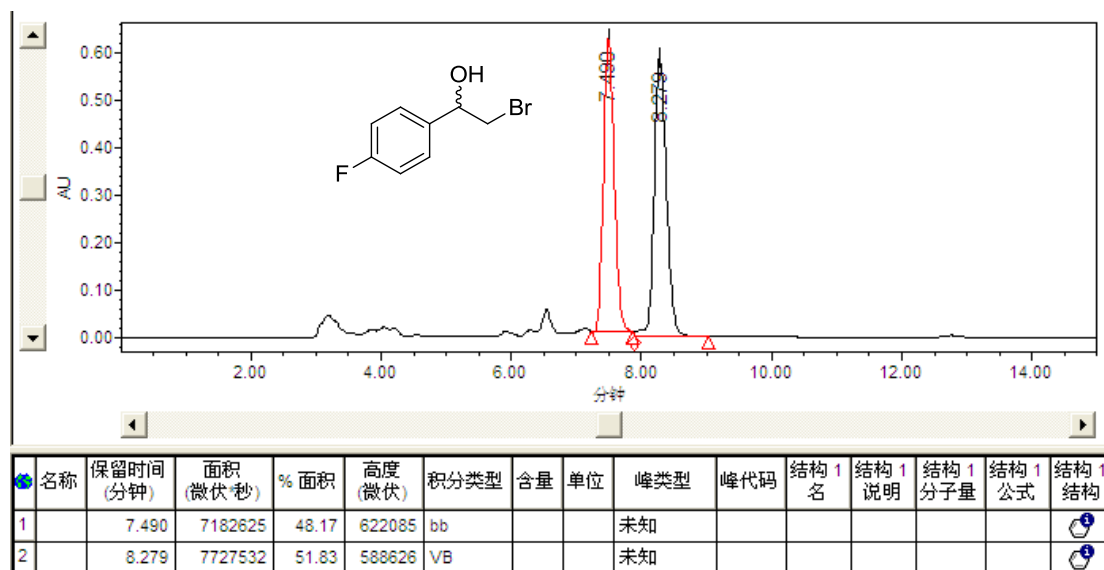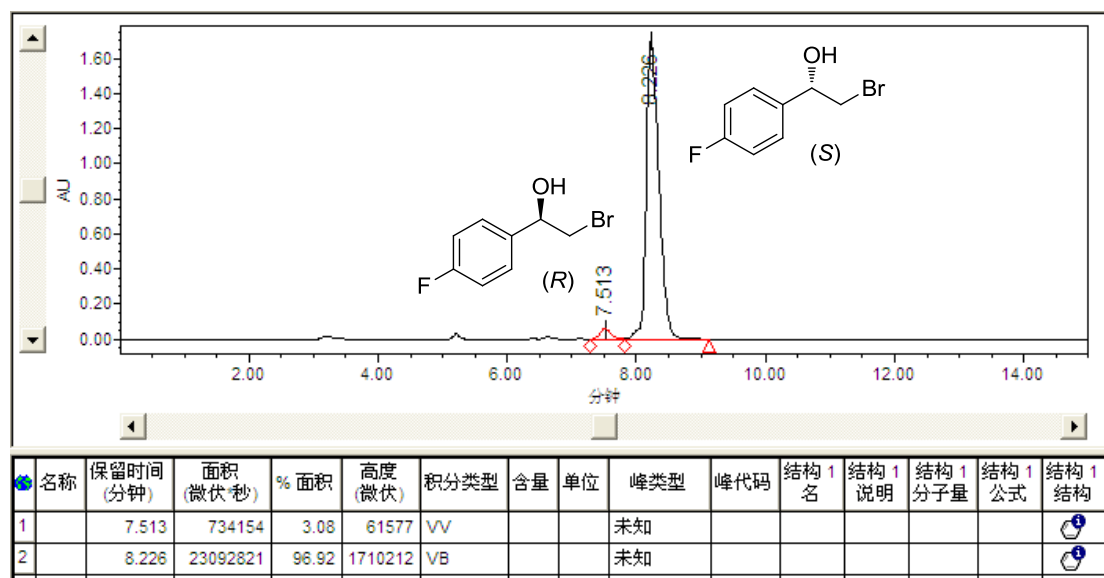

**(S)-2-bromo-1-(3-fluorophenyl)ethanol (6c):** (HPLC: Chiracel OB-H, detected at 215 nm, eluent: n-hexane/2-propanol = 90/10, flow rate = 1 mL/min, 25 °C).

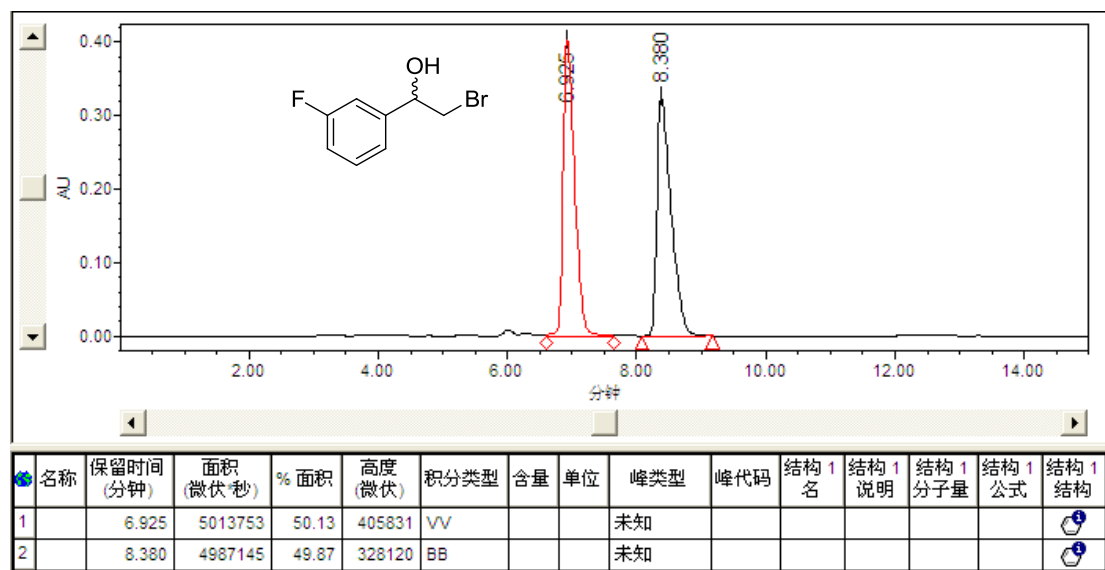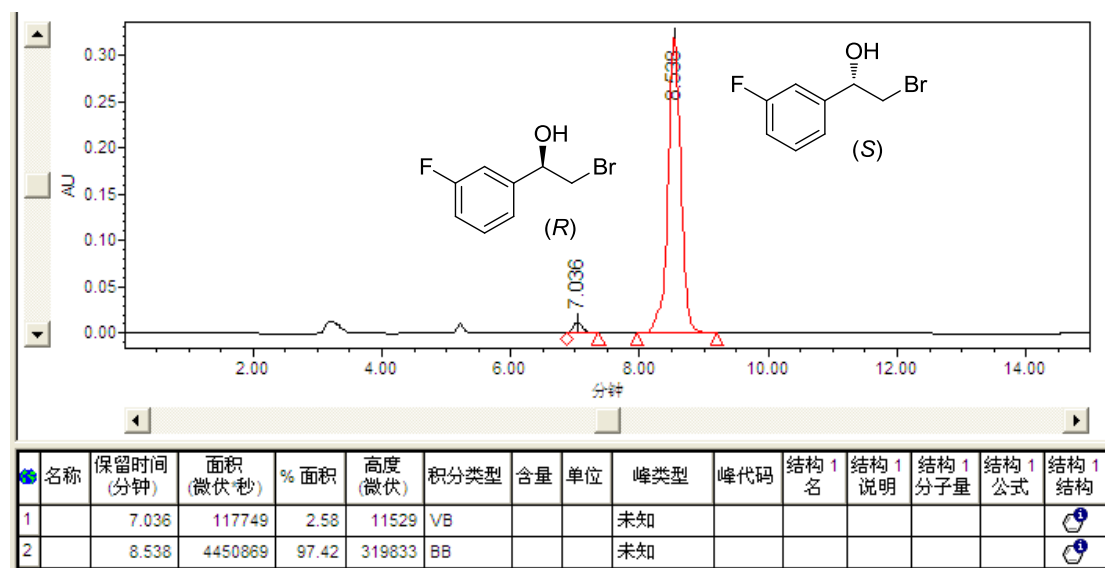

**(S)-2-bromo-1-(4-chlorophenyl)ethanol (6d):** (HPLC: Chiralcel OB-H, detected at 215 nm, eluent: n-hexane/2-propanol = 90/10, flow rate = 1 mL/min, 25 °C).

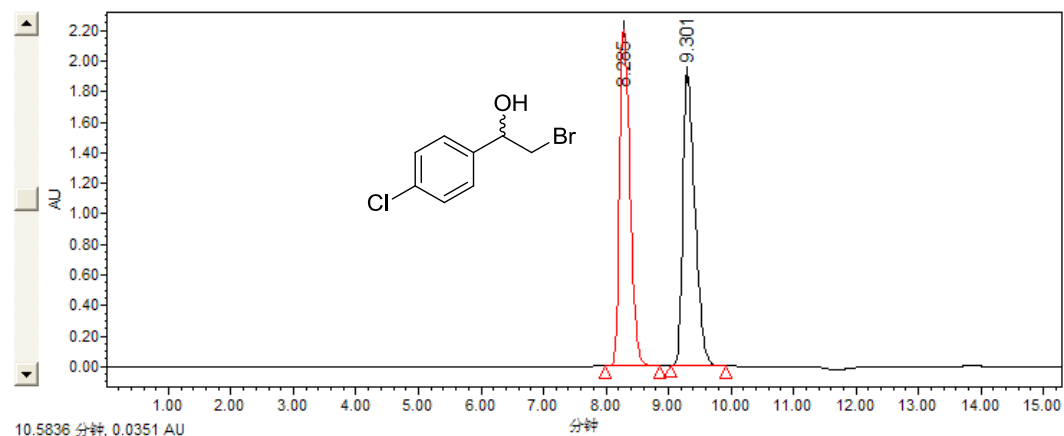

| 保留时间<br>(分钟) | 面积<br>(微伏秒) | % 面积  | 高度<br>(微伏) | % 高   |
|--------------|-------------|-------|------------|-------|
| 1            | 25773237    | 49.72 | 2204542    | 53.51 |
| 2            | 26060496    | 50.28 | 1915310    | 46.49 |

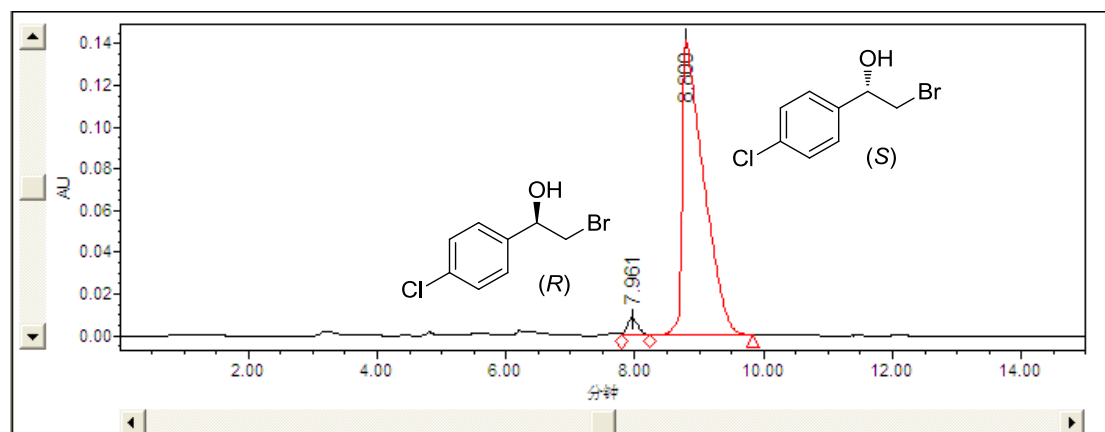

| 名称 | 保留时间<br>(分钟) | 面积<br>(微伏秒) | % 面积  | 高度<br>(微伏) | 积分类型 | 含量 | 单位 | 峰类型 | 峰代码 | 结构 1<br>名 | 结构 1<br>说明 | 结构 1<br>分子量 | 结构 1<br>公式 | 结构 1<br>结构 |
|----|--------------|-------------|-------|------------|------|----|----|-----|-----|-----------|------------|-------------|------------|------------|
| 1  | 7.961        | 98308       | 2.92  | 8277       | VV   |    |    | 未知  |     |           |            |             |            |            |
| 2  | 8.800        | 3268882     | 97.08 | 141939     | VB   |    |    | 未知  |     |           |            |             |            |            |

**(S)-2-bromo-1-(4-bromophenyl)ethanol (6e):** (HPLC: Chiracel OB-H, detected at 215 nm, eluent: n-hexane/2-propanol = 90/10, flow rate = 1 mL/min, 25 °C).

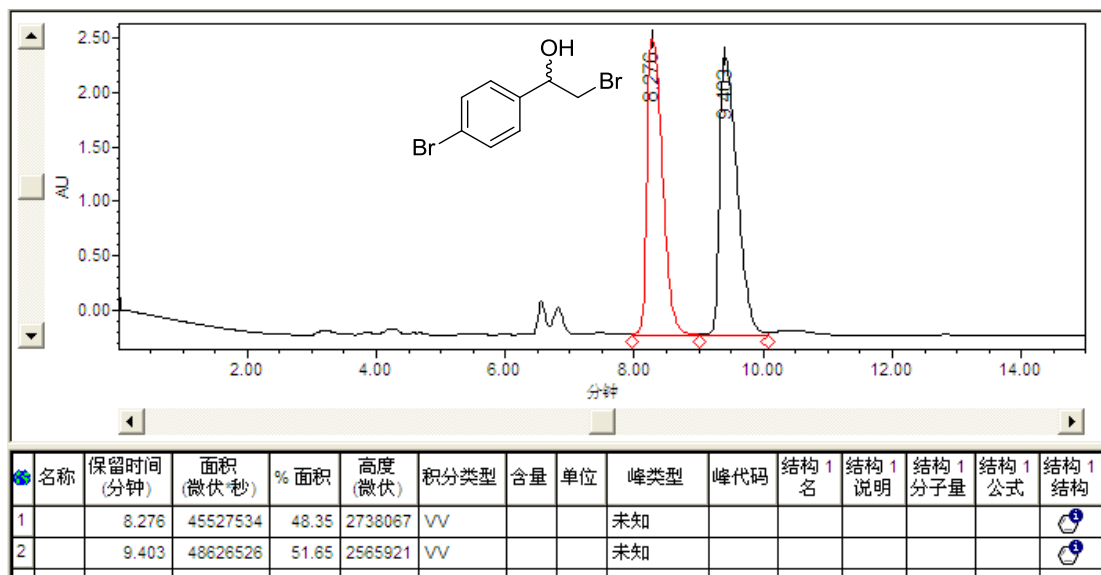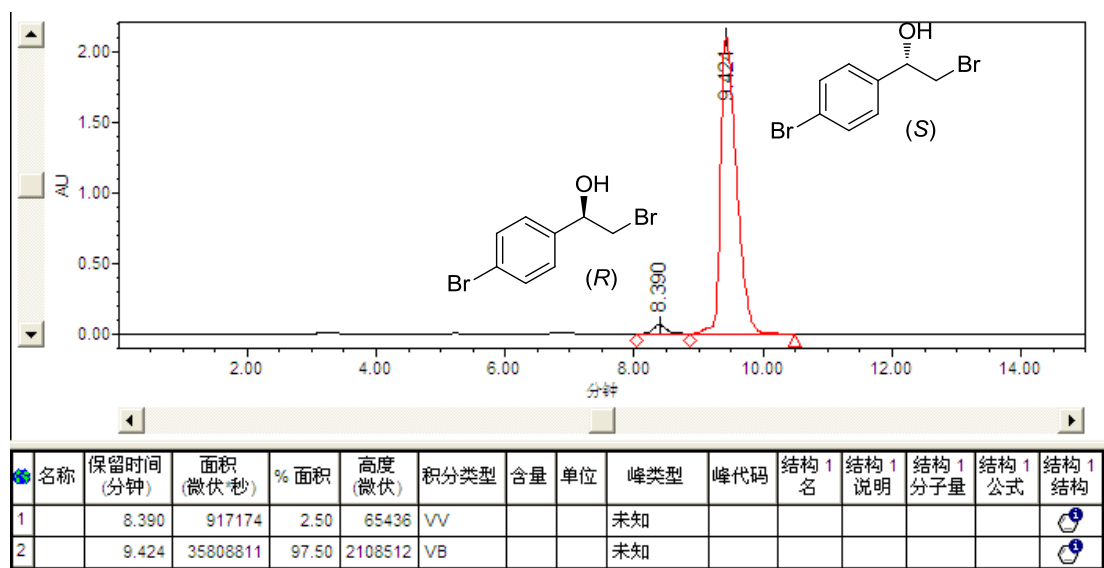



**(S)-2-bromo-1-(3-bromophenyl)ethanol (6f):** (HPLC: Chiracel OB-H, detected at 215 nm, eluent: n-hexane/2-propanol = 90/10, flow rate = 1 mL/min, 25 °C).

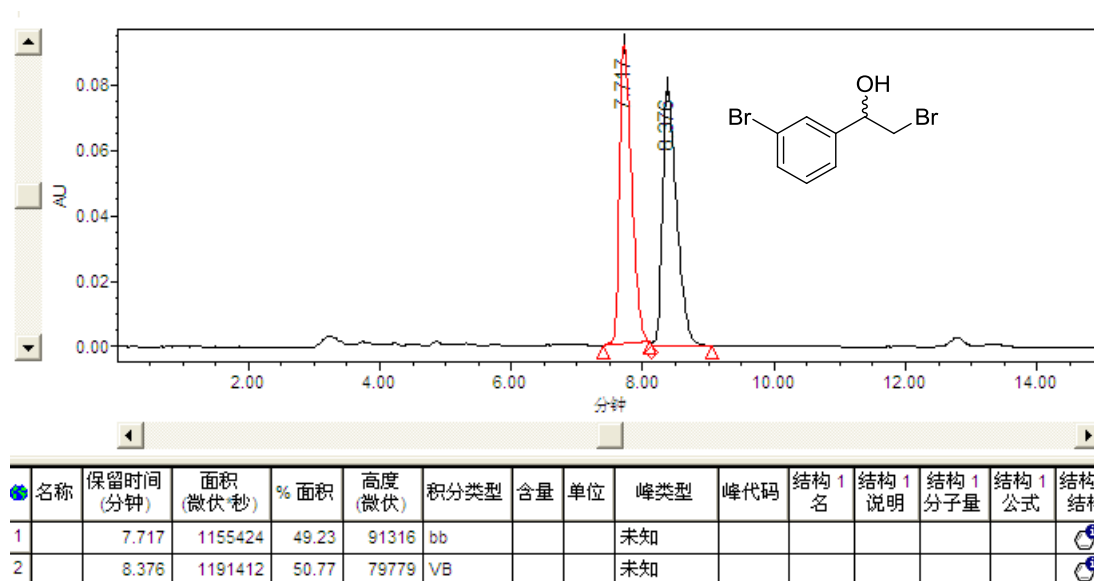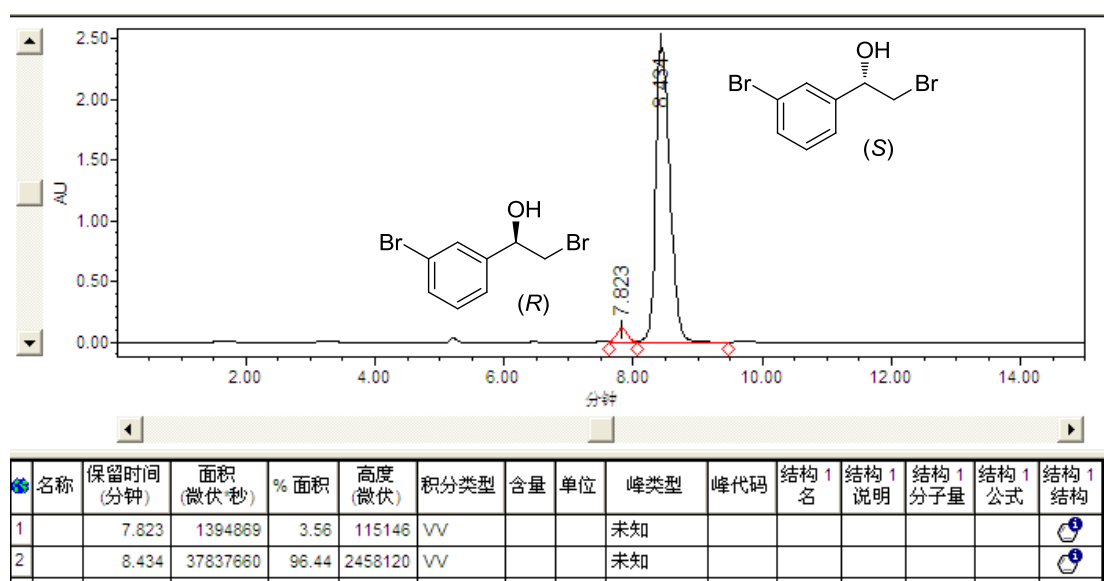

**(S)-2-bromo-1-(4-(trifluoromethyl)phenyl)ethanol (6g)**: (HPLC: Chiracel OB-H, detected at 215 nm, eluent: n-hexane/2-propanol = 90/10, flow rate = 1 mL/min, 25 °C).

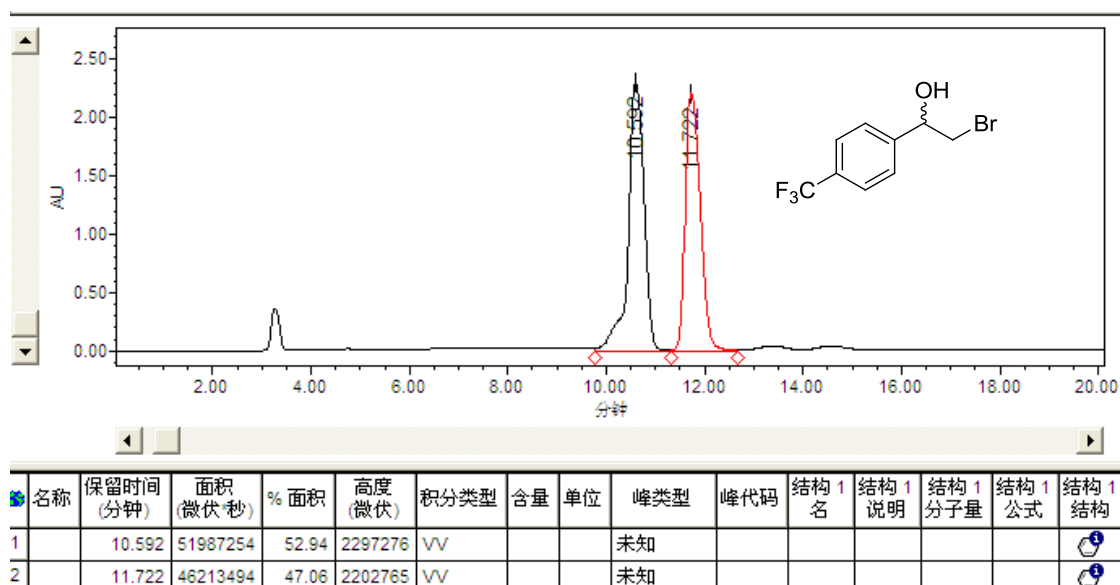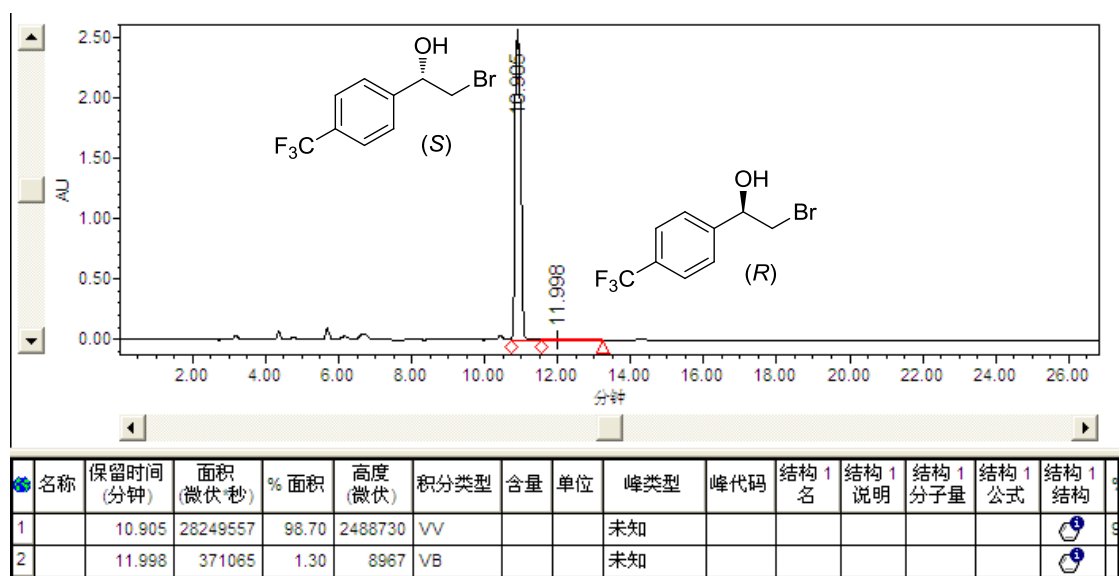

**(S)-2-bromo-1-(3,4-dichlorophenyl)ethanol (6h)**: (HPLC: Chiracel OB-H, detected at 254 nm, eluent: n-hexane/2-propanol = 90/10, flow rate = 1 mL/min, 25 °C).

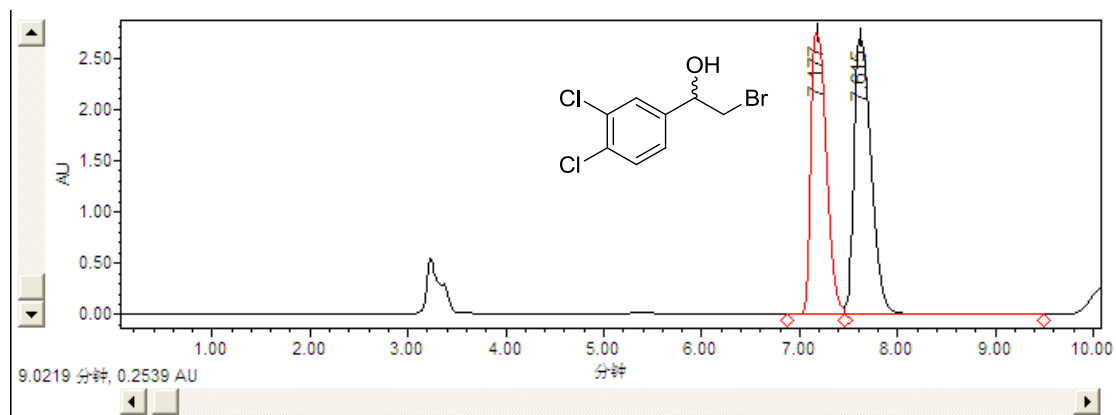

| 名称 | 保留时间 (分钟) | 面积 (微伏秒) | % 面积  | 高度 (微伏) | 积分类型 | 含量 | 单位 | 峰类型 | 峰代码 | 结构 1 名 | 结构 1 说明 | 结构 1 分子量 | 结构 1 公式 | 结构 1 结构 |
|----|-----------|----------|-------|---------|------|----|----|-----|-----|--------|---------|----------|---------|---------|
| 1  | 7.177     | 31131868 | 48.07 | 2775908 | VV   |    |    | 未知  |     |        |         |          |         |         |
| 2  | 7.615     | 33634557 | 51.93 | 2698439 | VV   |    |    | 未知  |     |        |         |          |         |         |

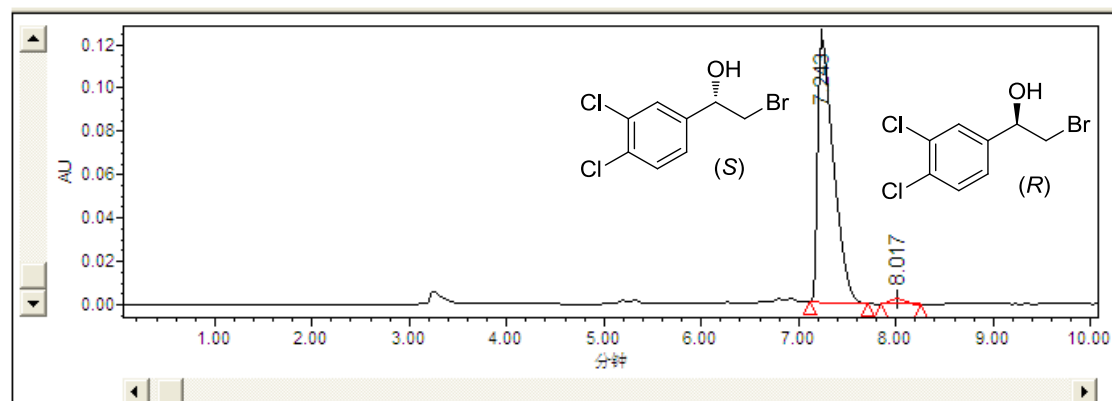

| 名称 | 保留时间 (分钟) | 面积 (微伏秒) | % 面积  | 高度 (微伏) | 积分类型 | 含量 | 单位 | 峰类型 | 峰代码 | 结构 1 名 | 结构 1 说明 | 结构 1 分子量 | 结构 1 公式 | 结构 1 结构 |
|----|-----------|----------|-------|---------|------|----|----|-----|-----|--------|---------|----------|---------|---------|
| 1  | 7.243     | 1400726  | 98.14 | 123727  | bb   |    |    | 未知  |     |        |         |          |         |         |
| 2  | 8.017     | 26488    | 1.86  | 2429    | bb   |    |    | 未知  |     |        |         |          |         |         |

**(S)-2-bromo-1-(4-nitrophenyl)ethanol (6i)**: (HPLC: Chiralcel OJ-H, detected at 215 nm, eluent: n-hexane/2-propanol = 90/10, flow rate = 1 mL/min, 25 °C).

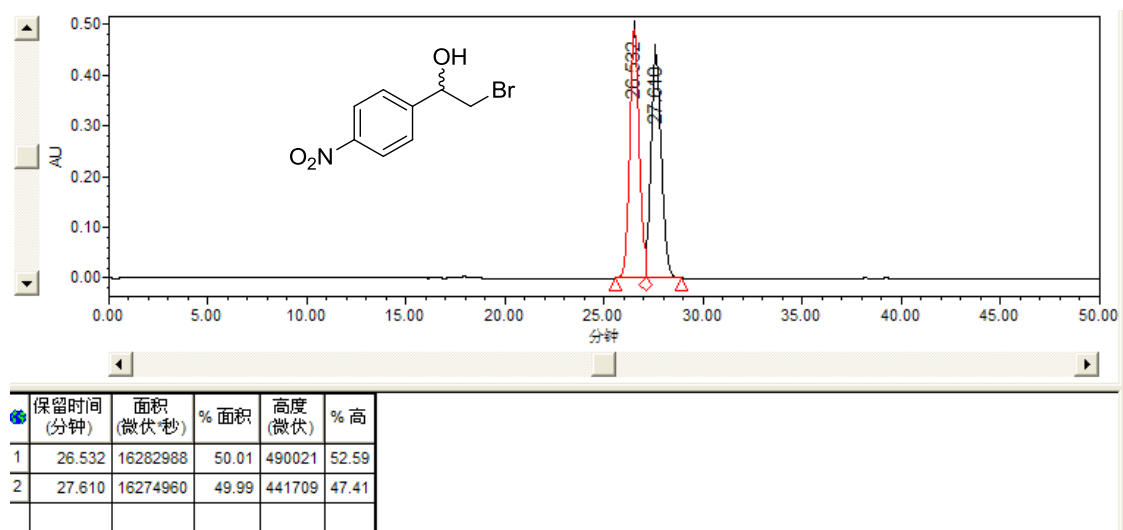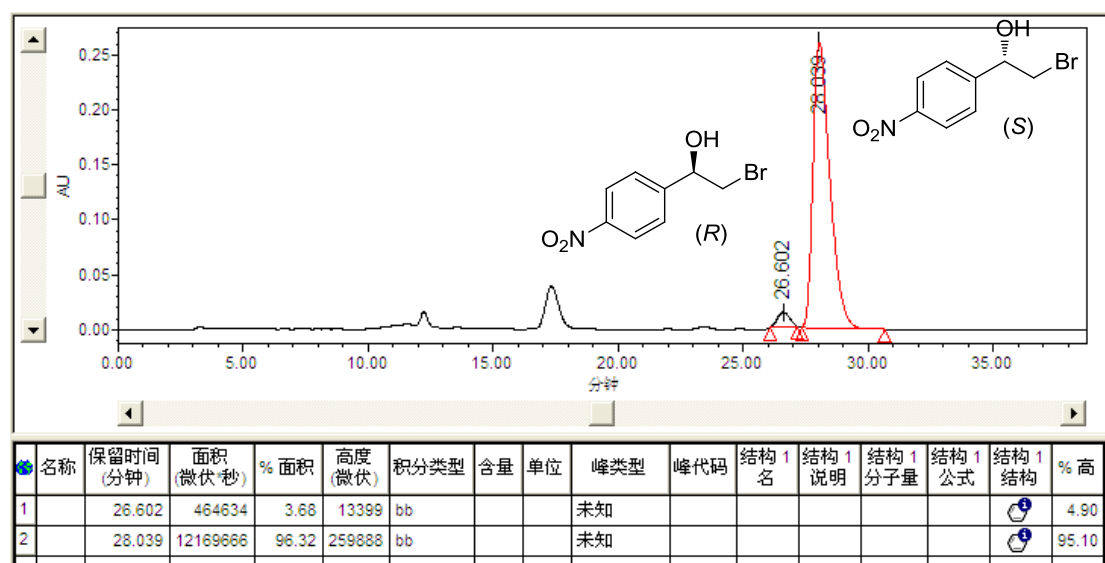

**(S)-2-bromo-1-(p-tolyl)ethanol (6j):** (HPLC: Chiralcel OB-H, detected at 215 nm, eluent: n-hexane/2-propanol = 90/10, flow rate = 1 mL/min, 25 °C).

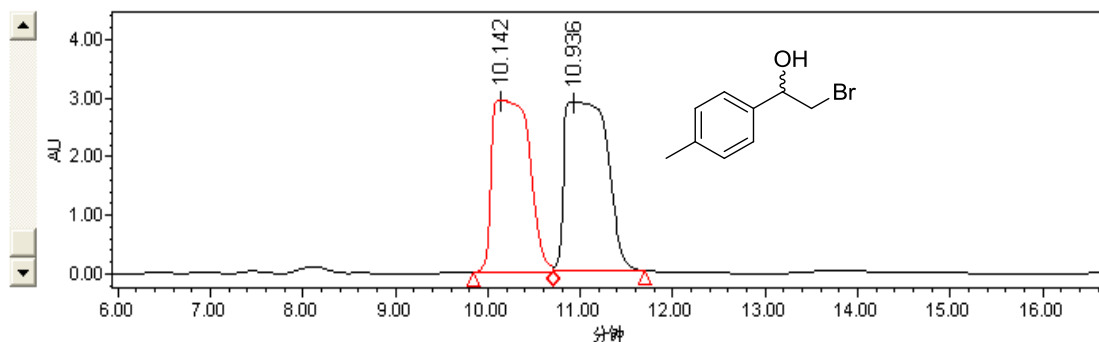

| 名称 | 保留时间 (分钟) | 面积 (微伏*秒) | % 面积  | 高度 (微伏) | 积分类型 | 含量 | 单位 | 峰类型 | 峰代码 | 结构1 名 | 结构1 说明 | 结构1 分子量 | 结构1 公式 | 结构1 结构 |
|----|-----------|-----------|-------|---------|------|----|----|-----|-----|-------|--------|---------|--------|--------|
| 1  | 10.142    | 83468202  | 47.38 | 2944037 | bV   |    |    | 未知  |     |       |        |         |        |        |
| 2  | 10.936    | 92717409  | 52.62 | 2889987 | Vb   |    |    | 未知  |     |       |        |         |        |        |

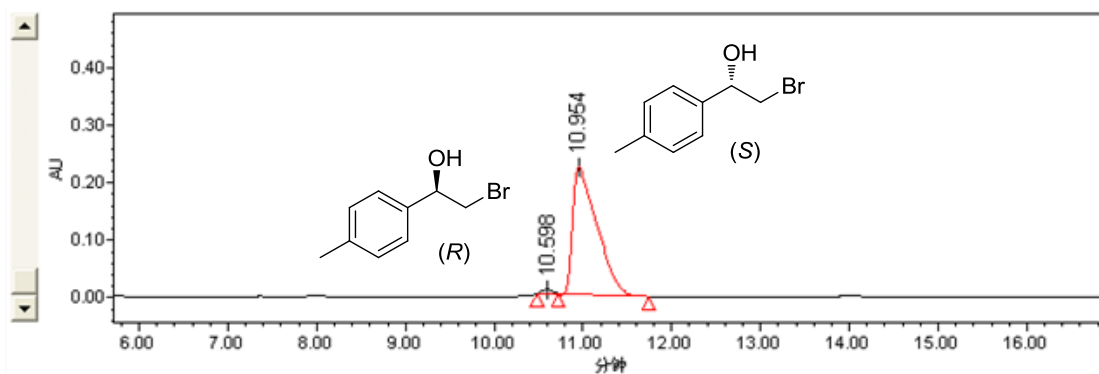

| 名称 | 保留时间 (分钟) | 面积 (微伏*秒) | % 面积  | 高度 (微伏) | 积分类型 | 含量 | 单位 | 峰类型 | 峰代码 | 结构1 名 | 结构1 说明 | 结构1 分子量 | 结构1 公式 | 结构1 结构 |
|----|-----------|-----------|-------|---------|------|----|----|-----|-----|-------|--------|---------|--------|--------|
| 1  | 10.598    | 57053     | 1.34  | 6806    | bb   |    |    | 未知  |     |       |        |         |        |        |
| 2  | 10.954    | 4208183   | 98.66 | 223301  | bb   |    |    | 未知  |     |       |        |         |        |        |

**(S)-2-bromo-1-(4-methoxyphenyl)ethanol (6k)**: (HPLC: Chiracel OB-H, detected at 215 nm, eluent: n-hexane/2-propanol = 90/10, flow rate = 1 mL/min, 25 °C).

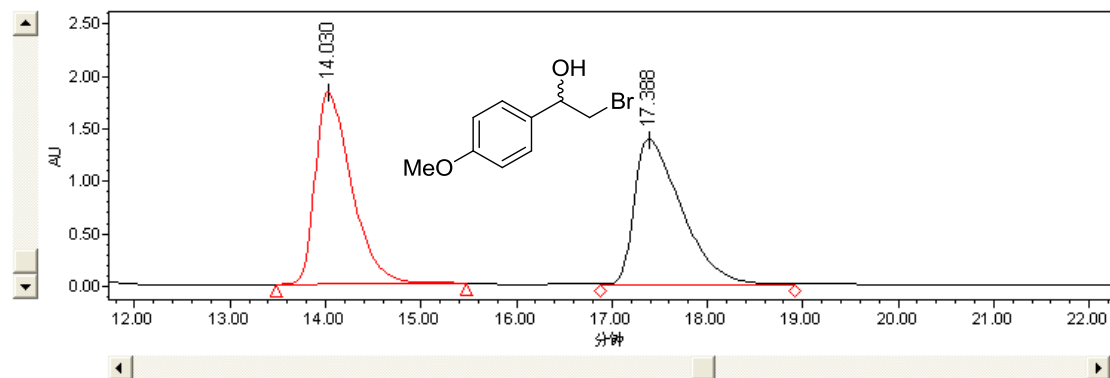

| 名称 | 保留时间 (分钟) | 面积 (微伏·秒) | % 面积  | 高度 (微伏) | 积分类型 | 含量 | 单位 | 峰类型 | 峰代码 | 结构 1 名 | 结构 1 说明 | 结构 1 分子量 | 结构 1 公式 | 结构 1 结构 |
|----|-----------|-----------|-------|---------|------|----|----|-----|-----|--------|---------|----------|---------|---------|
| 1  | 14.030    | 48373689  | 50.08 | 1832340 | bb   |    |    | 未知  |     |        |         |          |         |         |
| 2  | 17.388    | 48226683  | 49.92 | 1386227 | VV   |    |    | 未知  |     |        |         |          |         |         |

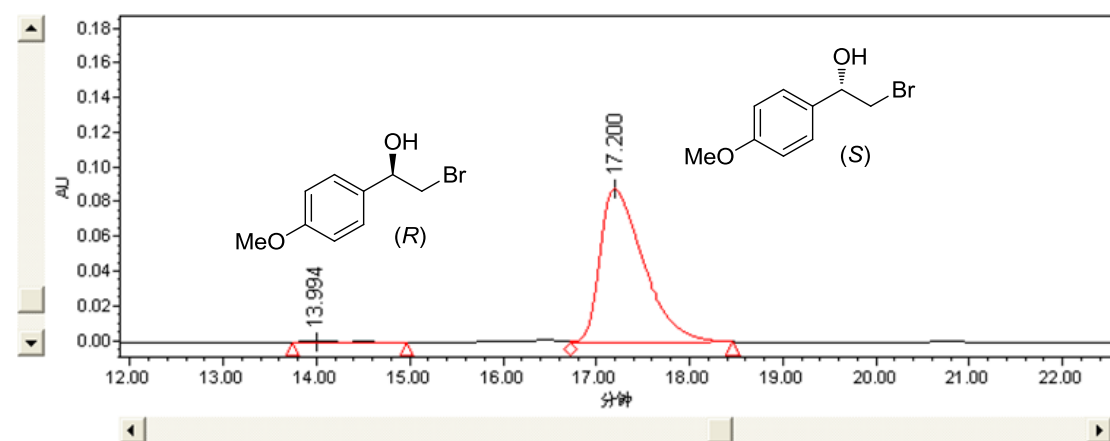

| 名称 | 保留时间 (分钟) | 面积 (微伏·秒) | % 面积  | 高度 (微伏) | 积分类型 | 含量 | 单位 | 峰类型 | 峰代码 | 结构 1 名 | 结构 1 说明 | 结构 1 分子量 | 结构 1 公式 | 结构 1 结构 |
|----|-----------|-----------|-------|---------|------|----|----|-----|-----|--------|---------|----------|---------|---------|
| 1  | 13.994    | 21226     | 0.74  | 601     | BB   |    |    | 未知  |     |        |         |          |         |         |
| 2  | 17.200    | 2830286   | 99.26 | 88502   | VB   |    |    | 未知  |     |        |         |          |         |         |

**(S)-2-bromo-1-(naphthalen-2-yl)ethanol (6l):** (HPLC: Chiracel OB-H, detected at 215 nm, eluent: n-hexane/2-propanol = 90/10, flow rate = 1 mL/min, 25 °C).

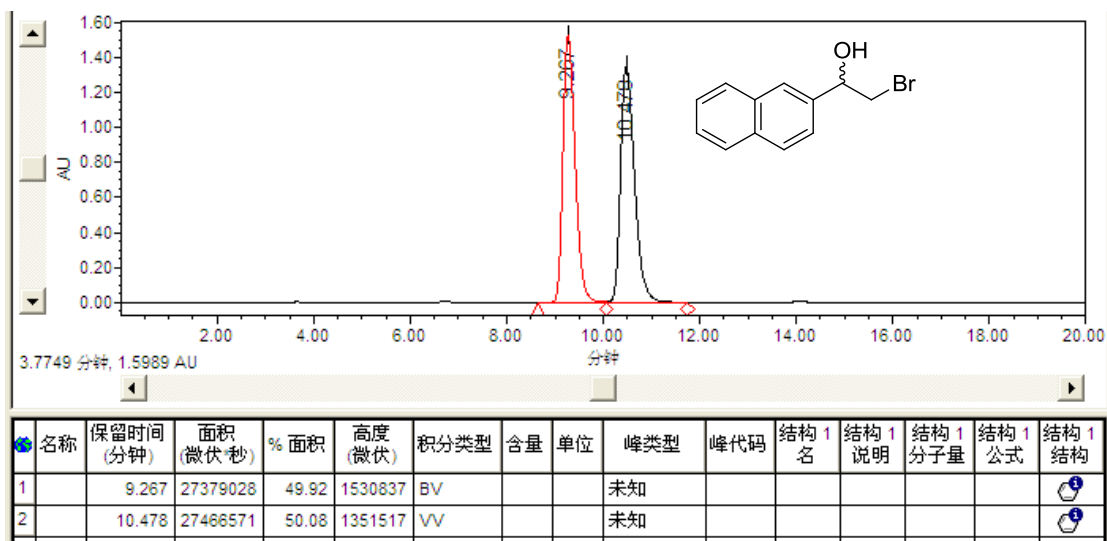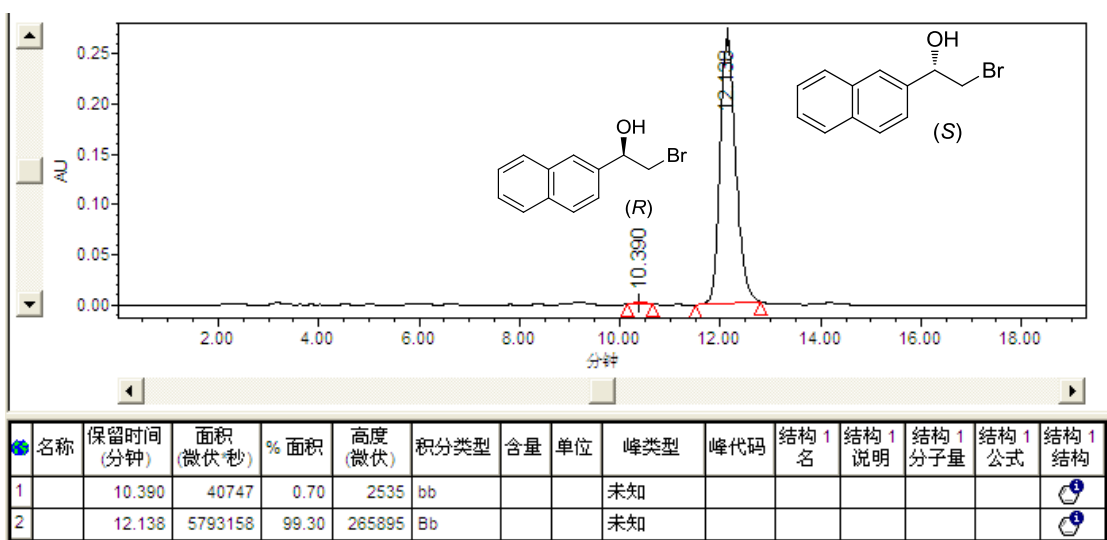

**(S)-2-chloro-1-(4-fluorophenyl)ethanol (6m)**: (HPLC: Chiracel OB-H, detected at 215 nm, eluent: n-hexane/2-propanol = 90/10, flow rate = 1 mL/min, 25 °C).

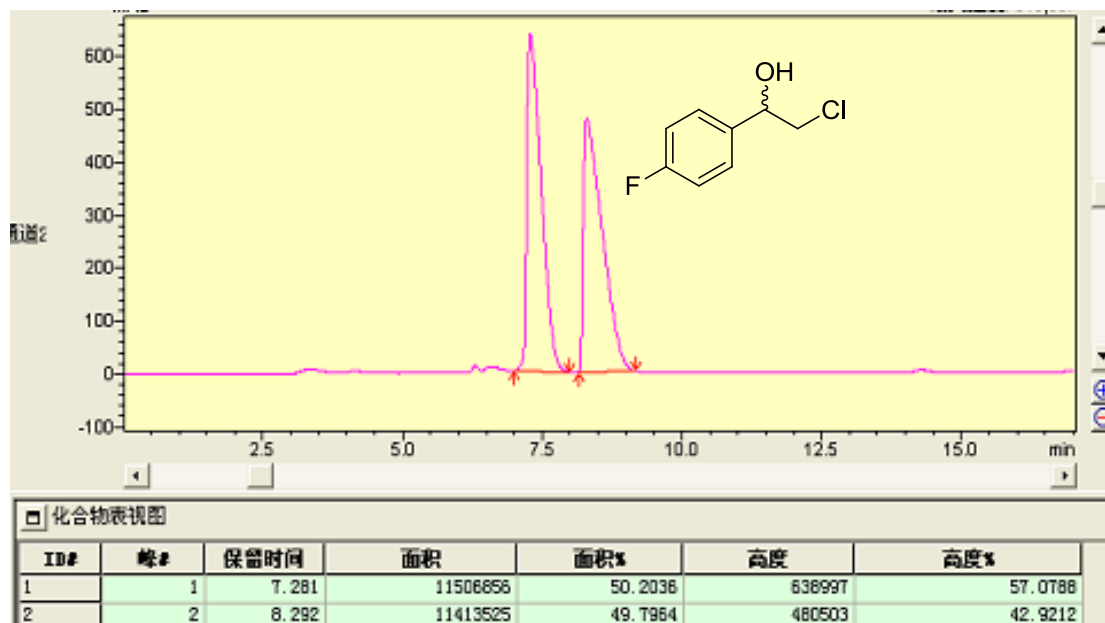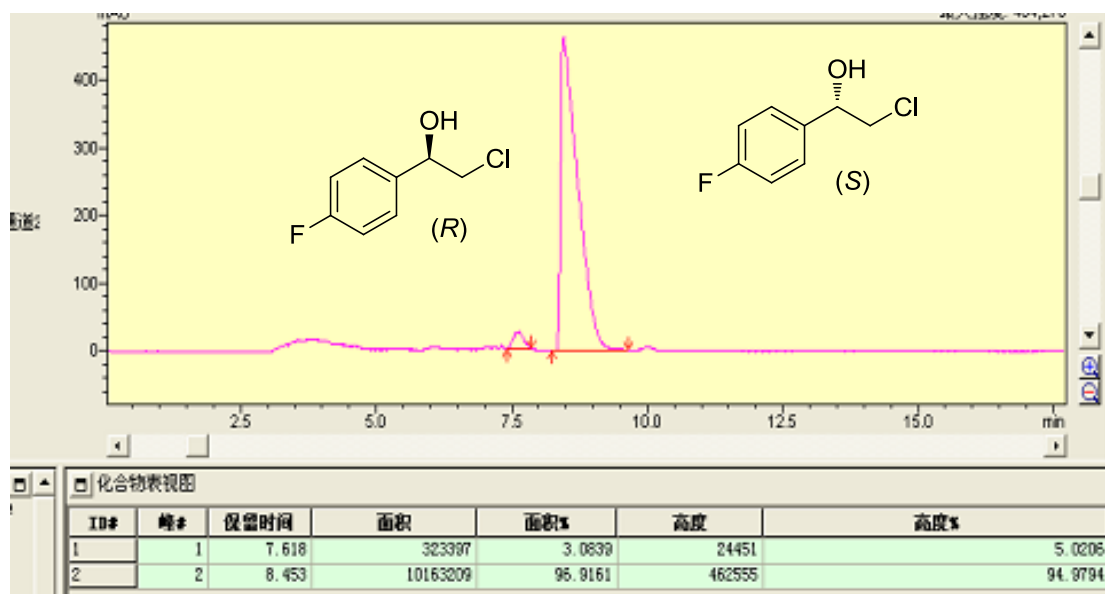



**(S)-2-chloro-1-(4-chlorophenyl)ethanol (6n)**: (HPLC: Chiracel OB-H, detected at 215 nm, eluent: n-hexane/2-propanol = 90/10, flow rate = 1 mL/min, 25 °C).

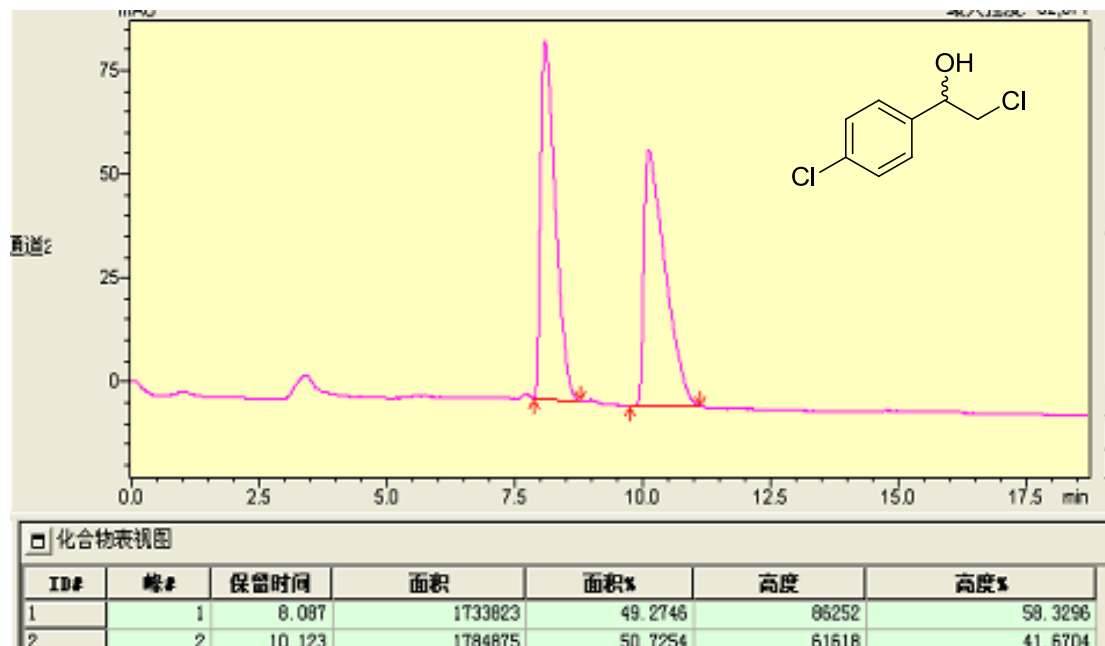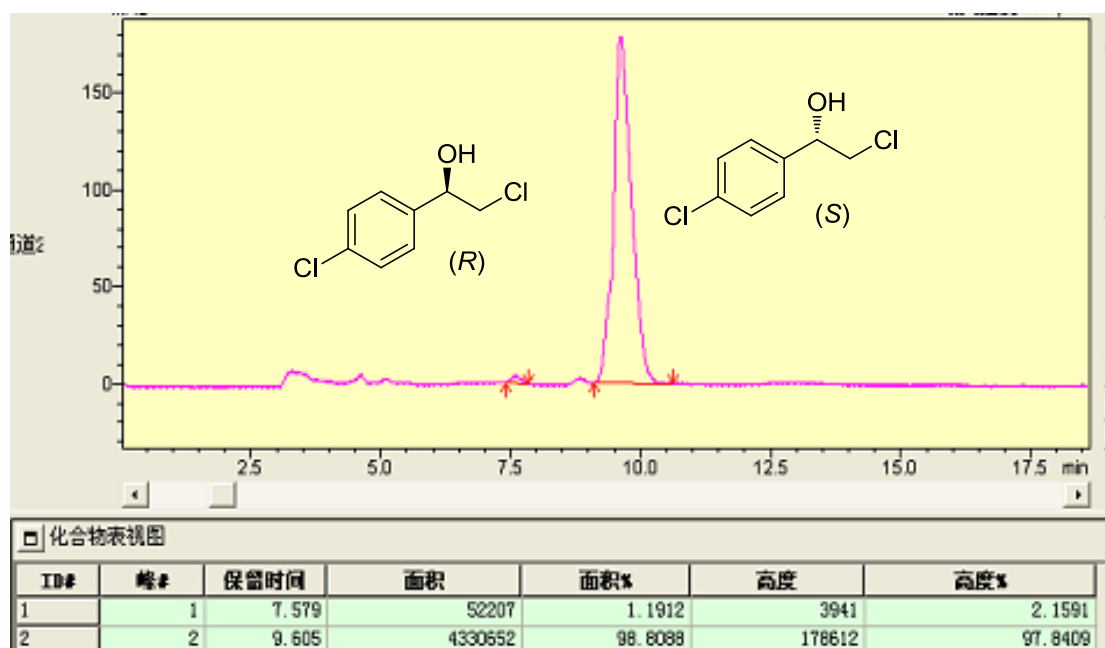

**Figure S3.** Reusability of the catalyst **5** using 2-bromo-1-phenylethanone as a substrate.

Recycle 2.

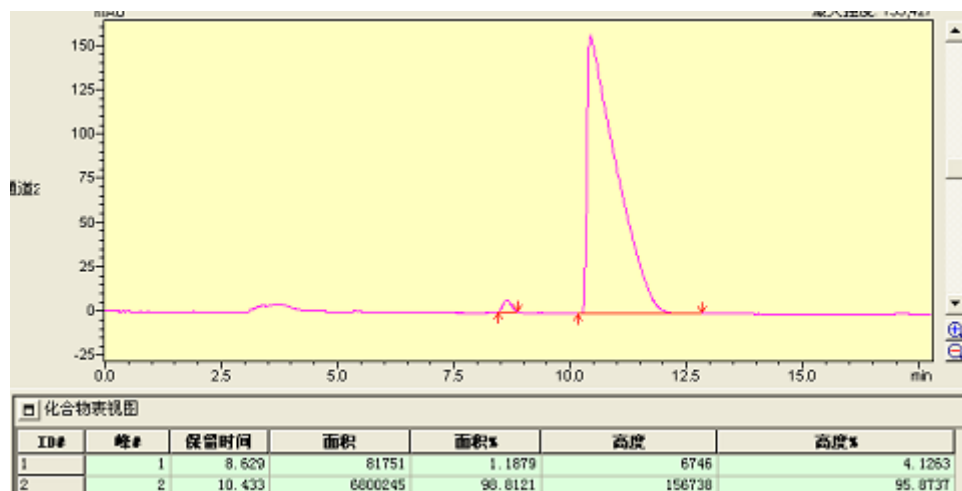

Recycle 3.

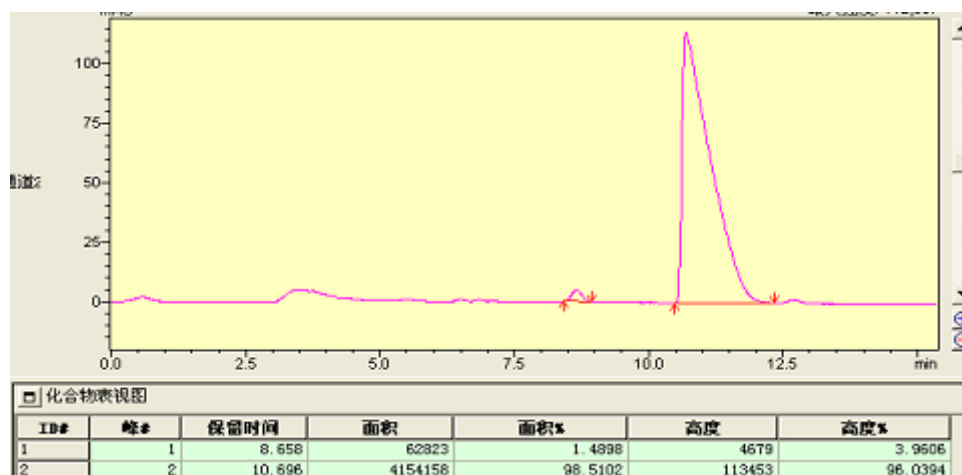

Recycle 4.

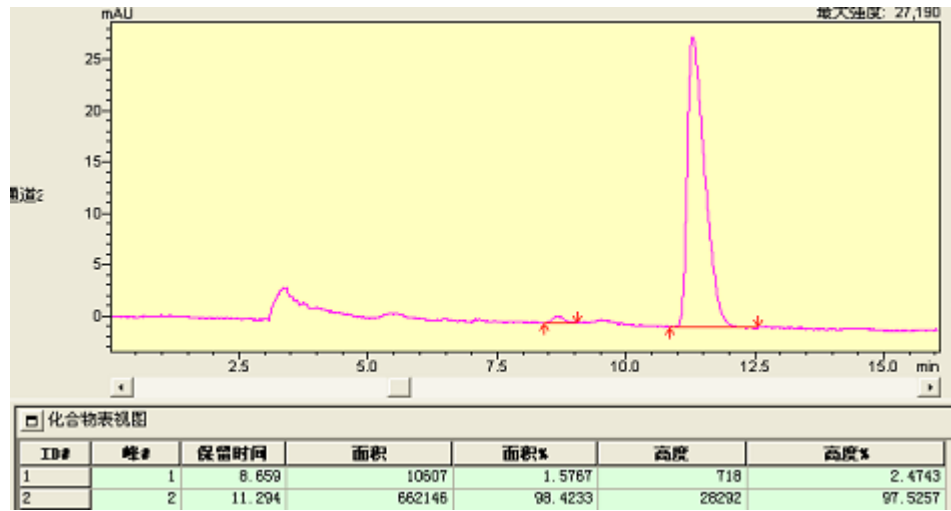

Recycle 5.

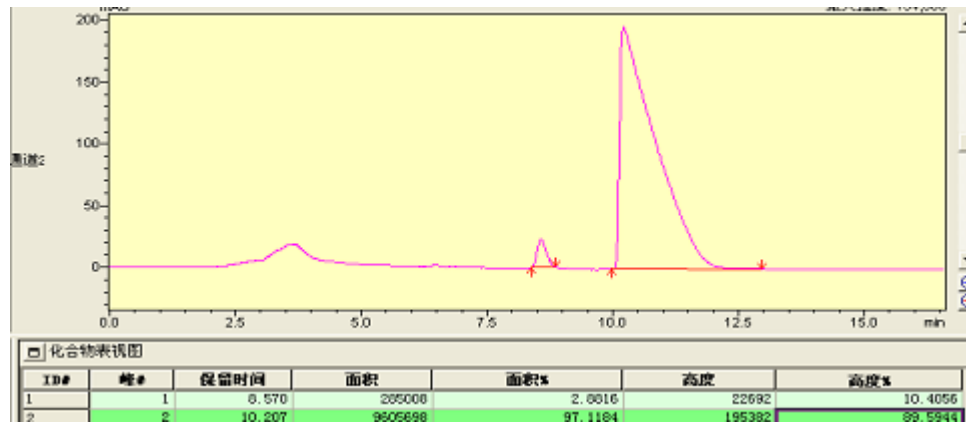

Recycle 6.

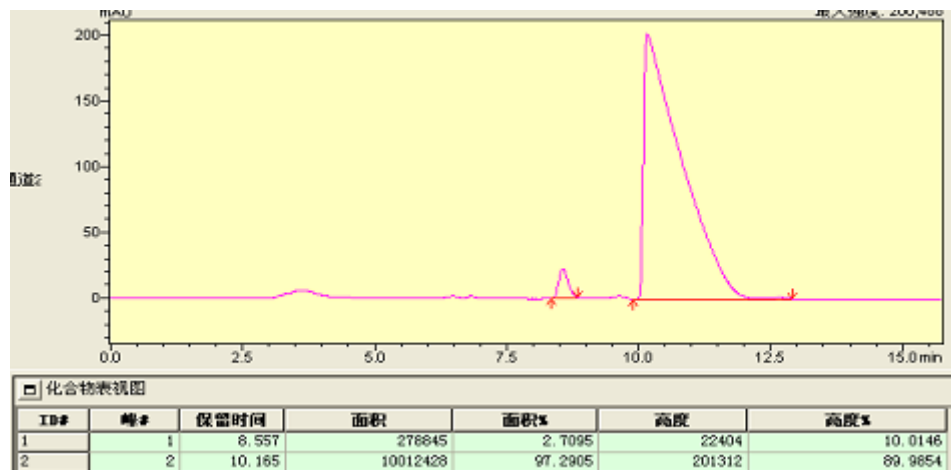

Recycle 7.

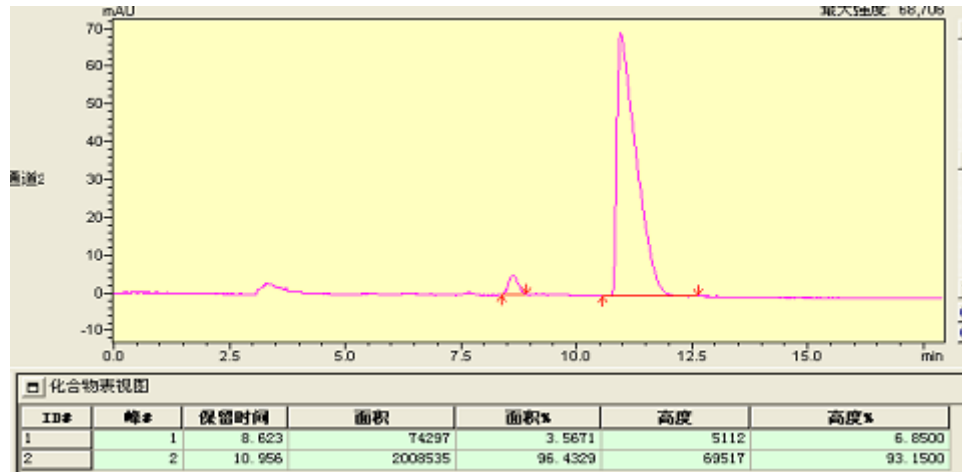

Recycle 8.

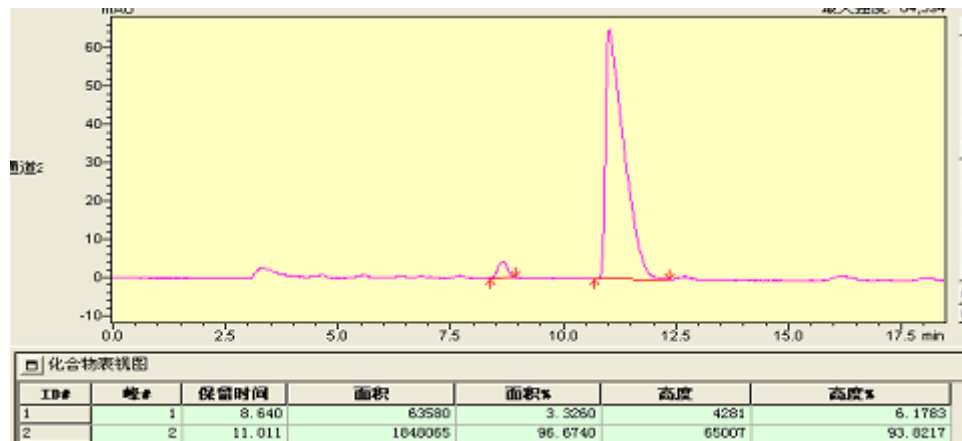

Recycle 9.

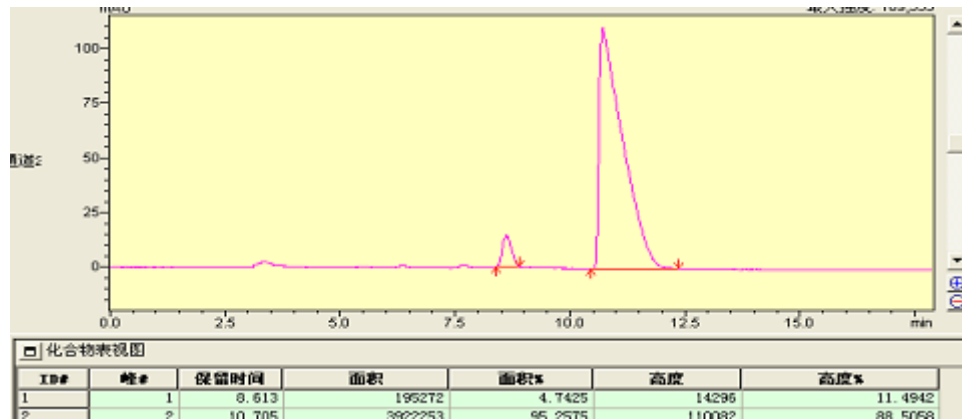

**Figure S4.** Asymmetric transfer hydrogenation of benzil catalyzed by catalyst **5**, PMO-supported analogue and SBA-supported analogue. Reactions were carried out at 40 °C, using 10.0  $\mu\text{mol}$  of the catalyst, 5 equiv HCOONa, and at an S/C ratio of 100 in 5.0 mL of water.

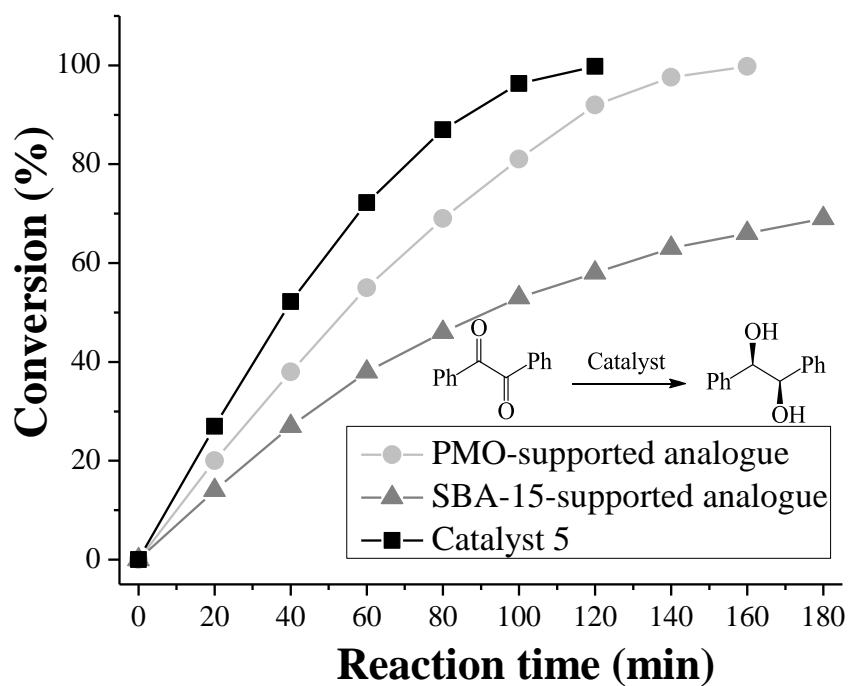

**Figure S5.** Asymmetric transfer hydrogenation of symmetrical benzils [The products were analyzed by a HPLC with a UV-Vis detector using a Daicel OD-H or OJ-H chiralcel column (  $\Phi$ 0.46×25 cm)] (Literature: *Chin. J. Chem.* 2012, 30, 2657).

***Translation of Chinese to English is as follows:***

| Peak | RetTime [min] | Area      | Area ratio % | Height  |      |    |    |     |     |        |         |          |         |         |
|------|---------------|-----------|--------------|---------|------|----|----|-----|-----|--------|---------|----------|---------|---------|
| 名称   | 保留时间 (分钟)     | 面积 (微伏·秒) | % 面积         | 高度 (微伏) | 积分类型 | 含量 | 单位 | 峰类型 | 峰代码 | 结构 1 名 | 结构 1 说明 | 结构 1 分子量 | 结构 1 公式 | 结构 1 结构 |
| 1    | 8.499         | 18644684  | 49.95        | 1331866 | VV   |    |    | 未知  |     |        |         |          |         |         |
| 2    | 9.358         | 18683896  | 50.05        | 1150448 | VV   |    |    | 未知  |     |        |         |          |         |         |

***(S,S)*-1,2-diphenylethane-1,2-diol (6a):** (HPLC: Chiralcel OJ-H, detected at 220 nm, eluent: n-hexane/2-propanol = 90/10, flow rate = 0.5 mL/min, 25 °C).

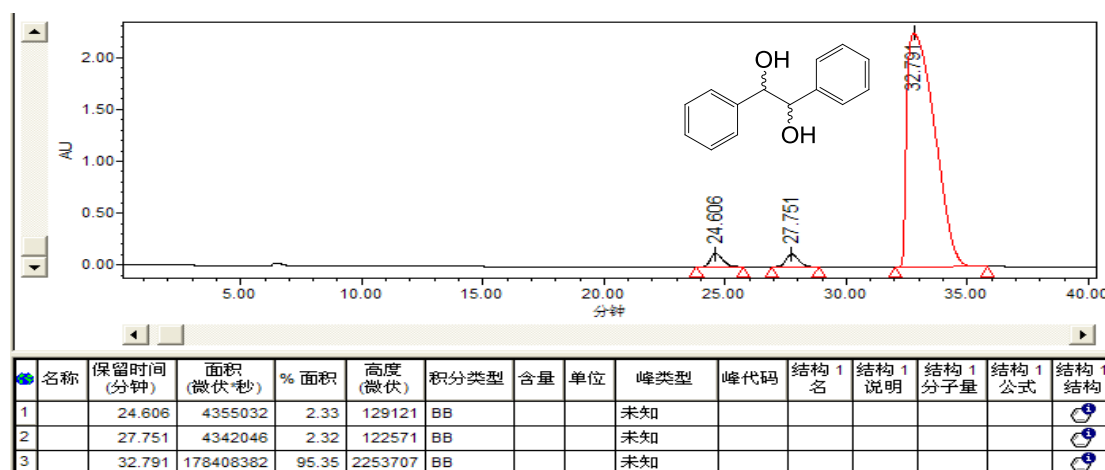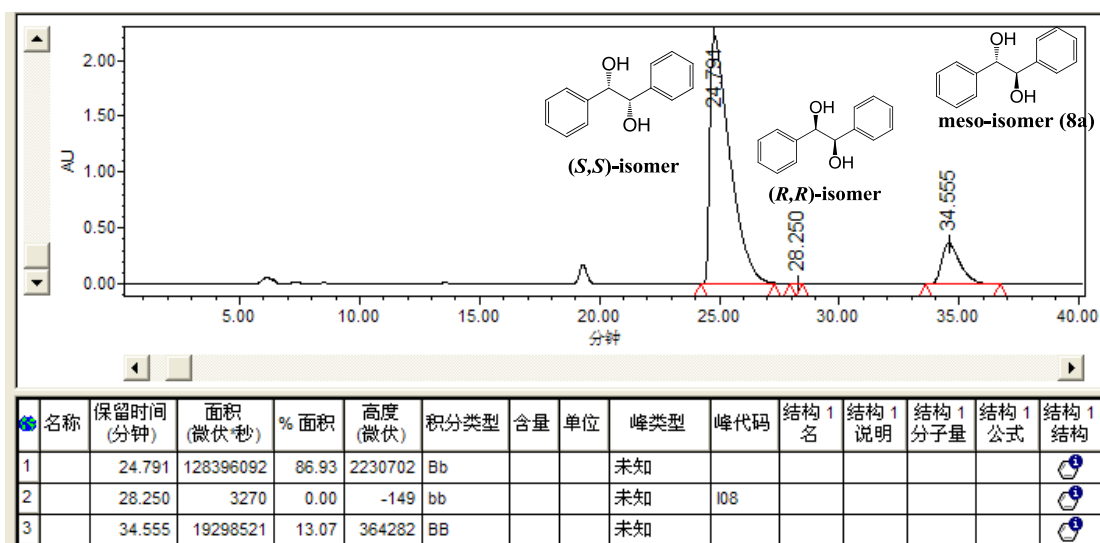

***Translation of Chinese to English is as follows:***

| Peak | RetTime [min] | Area     | Area%   | Height  | Height% |
|------|---------------|----------|---------|---------|---------|
| 峰号   | 保留时间          | 面积       | 面积%     | 峰高      | 峰高%     |
| 1    | 18.474        | 235619.9 | 92.0500 | 13827.2 | 79.0665 |
| 2    | 19.395        | 9109.7   | 3.5589  | 1042.4  | 5.9606  |

***(S,S)-1,2-bis(4-fluorophenyl)ethane-1,2-diol (7b):*** (HPLC: Chiracel OJ-H, detected at 220 nm, eluent: n-hexane/2-propanol = 90/10, flow rate = 0.5 mL/min, 25 °C).

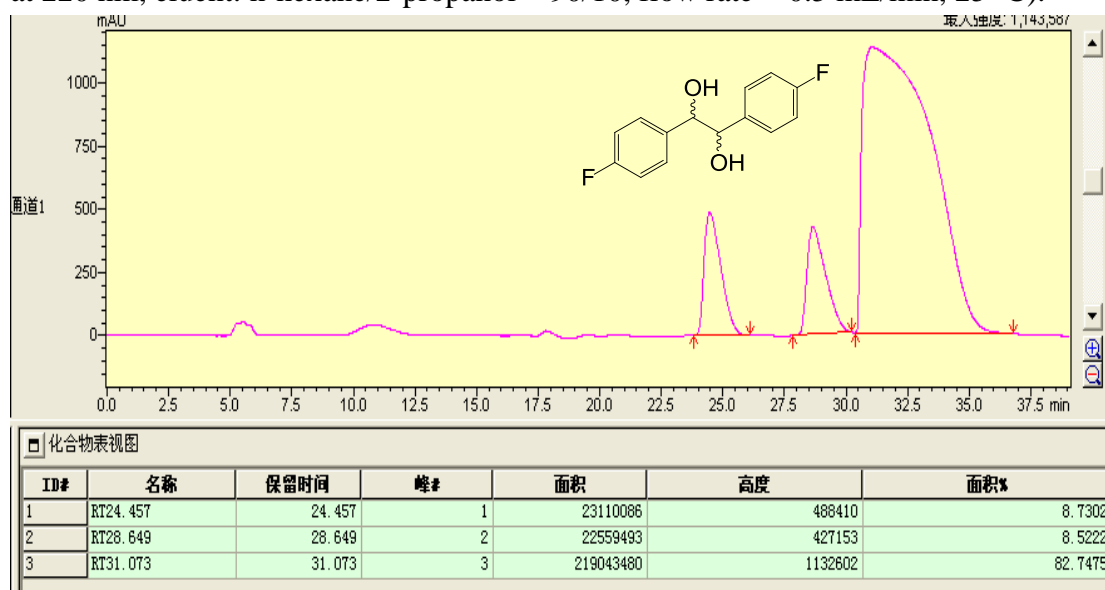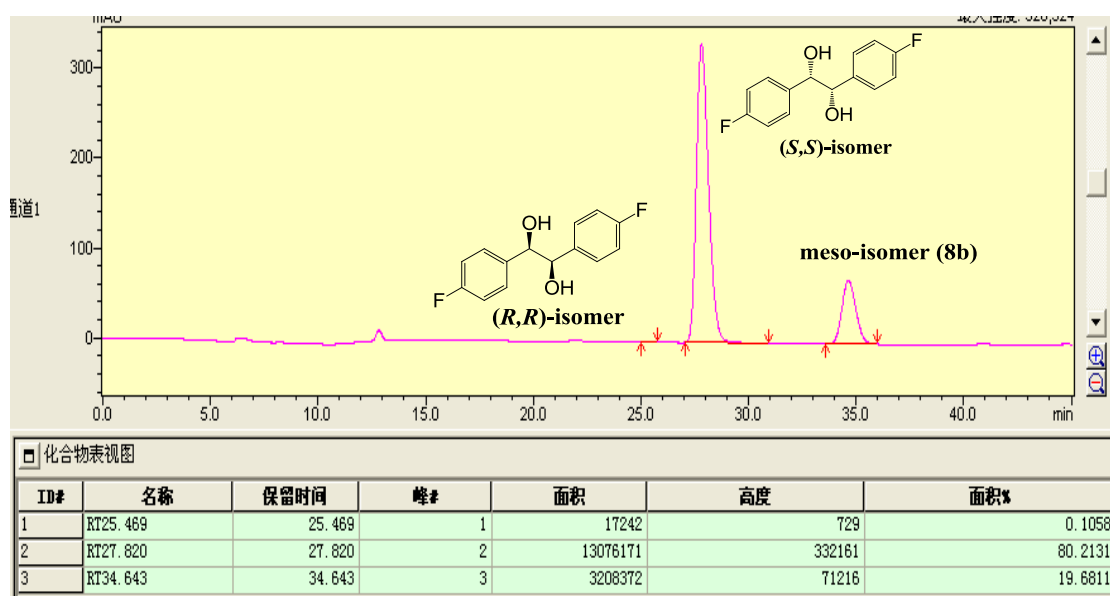

**(S,S)-1,2-bis(3-fluorophenyl)ethane-1,2-diol (7c)**: (HPLC: Chiracel OJ-H, detected at 220 nm, eluent: n-hexane/2-propanol = 90/10, flow rate = 0.5 mL/min, 25 °C).

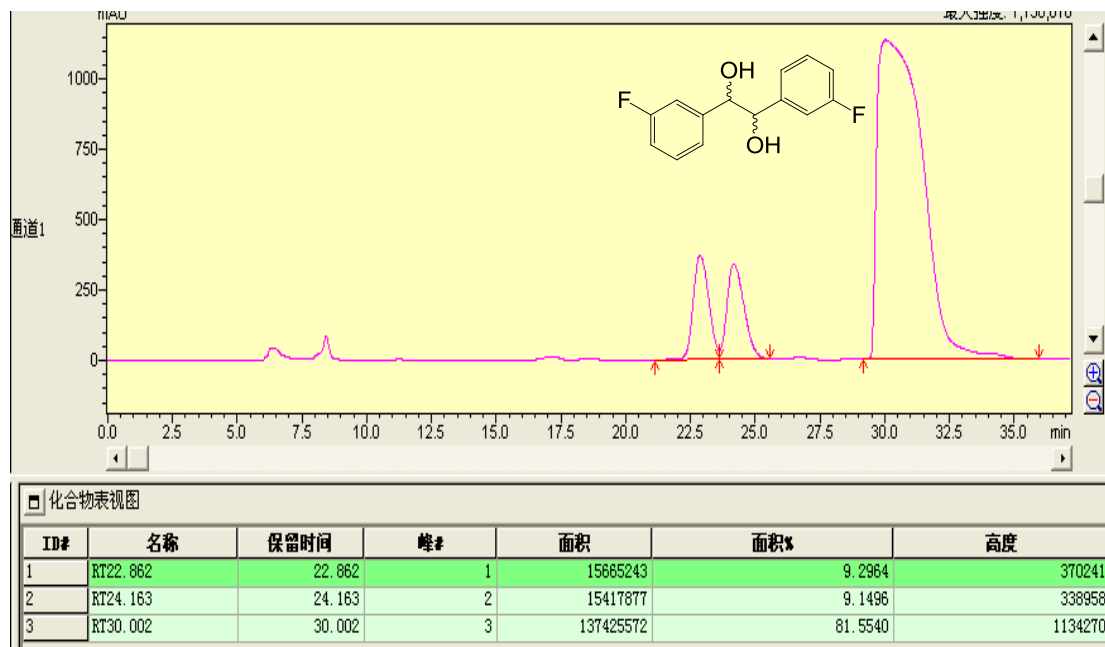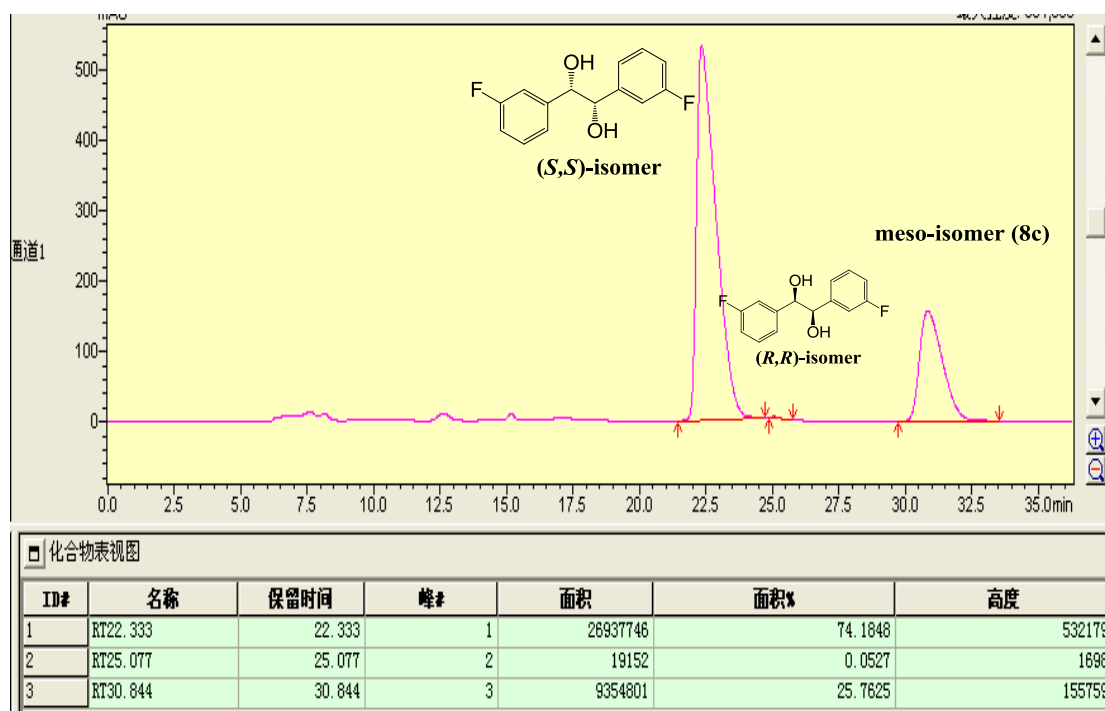



**(S,S)-1,2-bis(4-bromophenyl)ethane-1,2-diol (7d)**: (HPLC: Chiracel AD-H, detected at 220 nm, eluent: n-hexane/2-propanol = 92/8, flow rate = 0.5 mL/min, 25 °C).

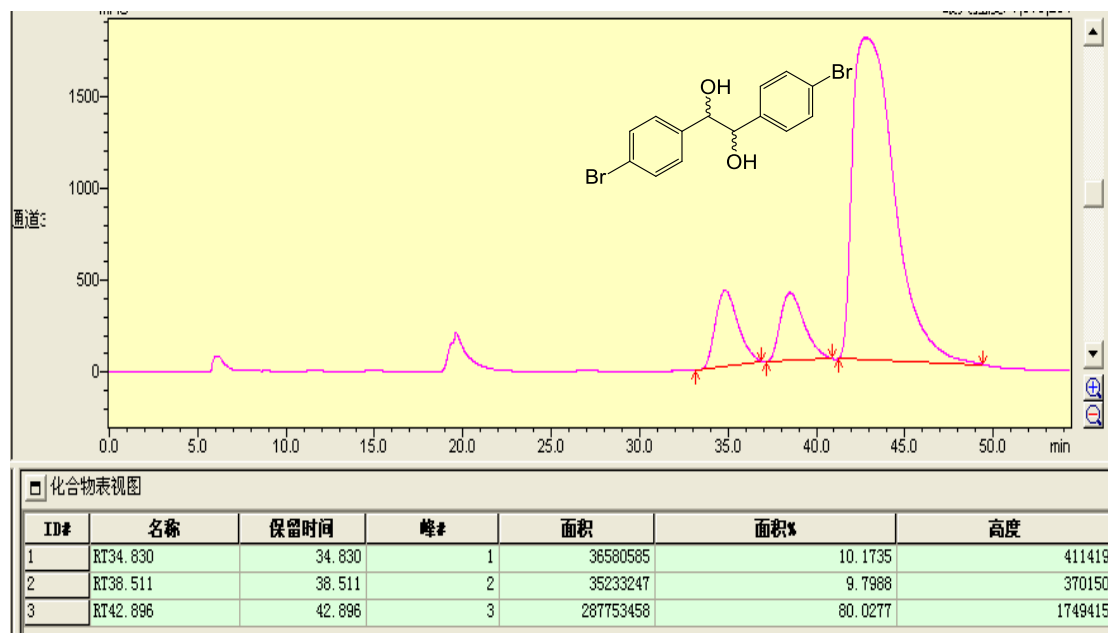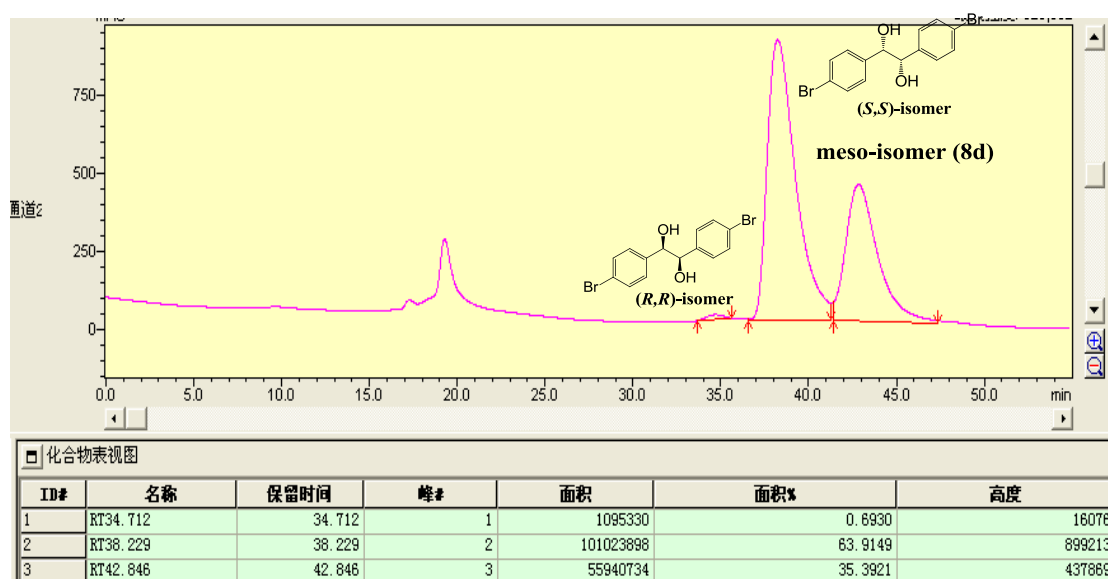

**(S,S)-1,2-di-p-tolyethane-1,2-diol (7e)**: (HPLC: Chiralcel OJ-H, detected at 220 nm, eluent: n-hexane/2-propanol = 96/4, flow rate = 0.5 mL/min, 25 °C).

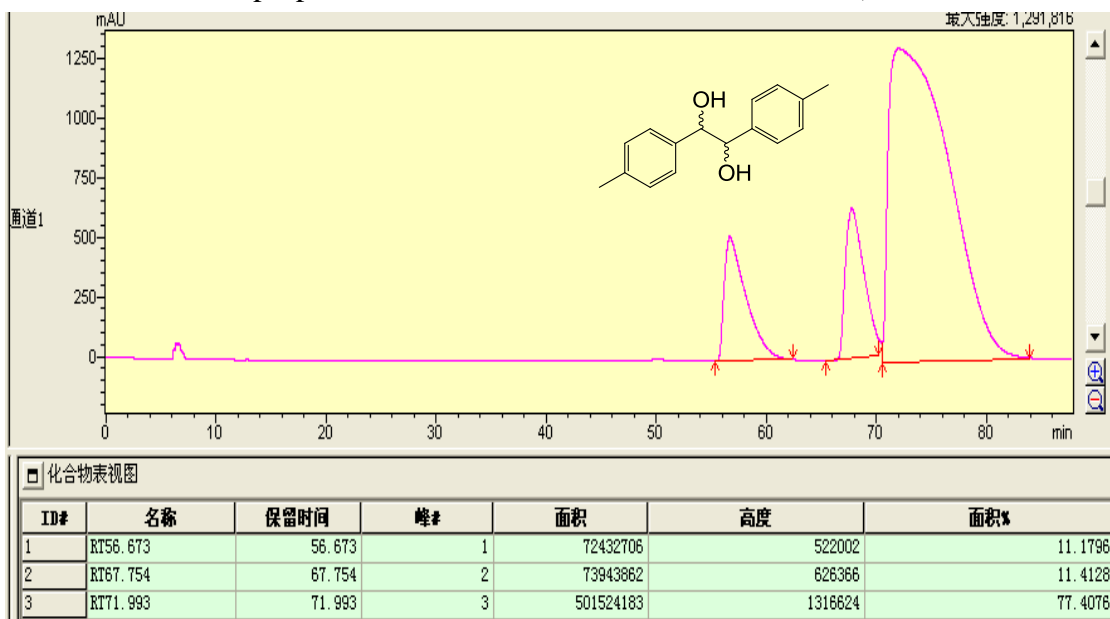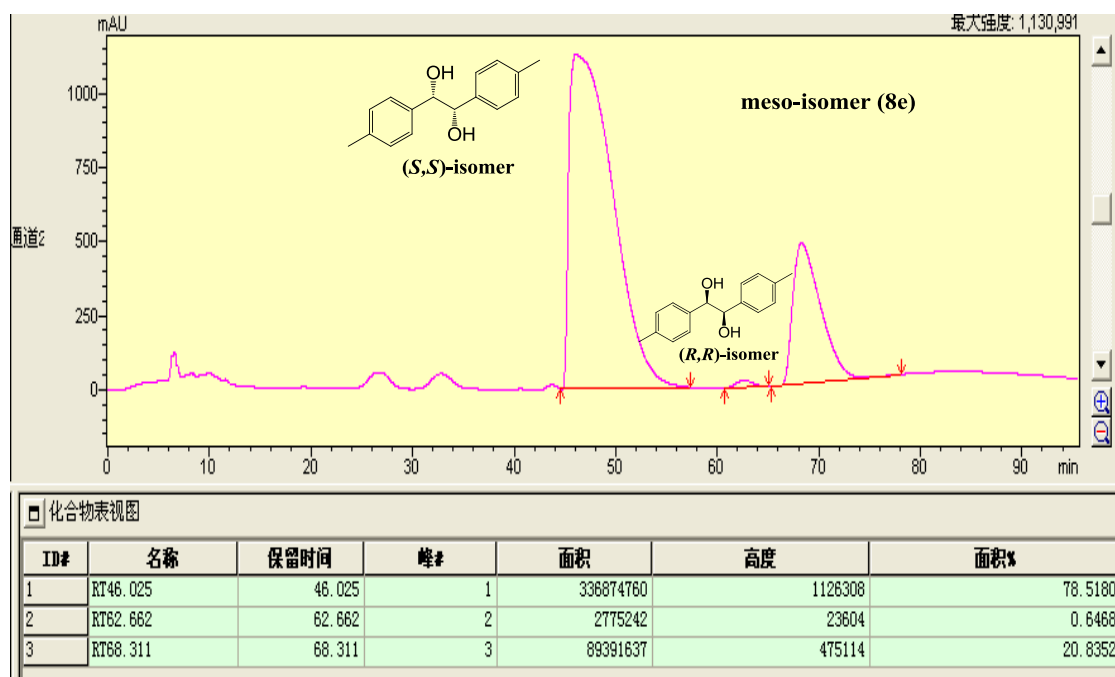

**(S,S)-1,2-bis(4-methoxyphenyl)ethane-1,2-diol (7f)**: (HPLC: Chiracel OJ-H, detected at 220 nm, eluent: n-hexane/2-propanol = 80/20, flow rate = 0.5 mL/min, 25 °C).

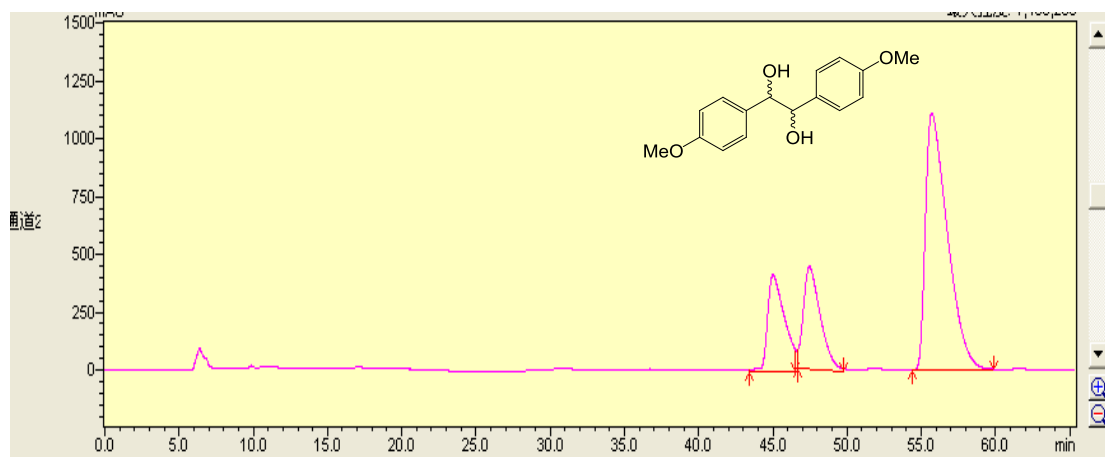

化合物表视图

| ID# | 名称       | 保留时间   | 峰# | 面积        | 面积%     | 高度      |
|-----|----------|--------|----|-----------|---------|---------|
| 1   | RT45.004 | 45.004 | 1  | 33382014  | 18.2583 | 419170  |
| 2   | RT47.465 | 47.465 | 2  | 35335351  | 19.3267 | 442701  |
| 3   | RT55.717 | 55.717 | 3  | 114114211 | 62.4149 | 1112095 |

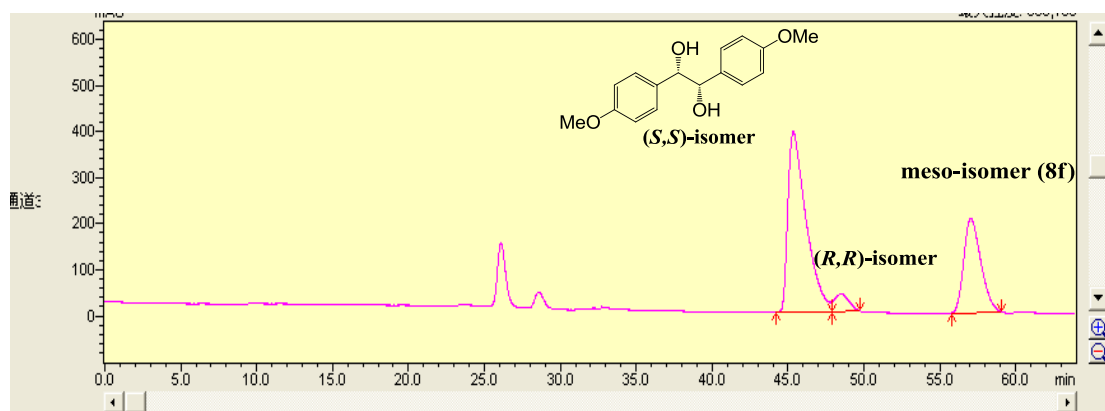

化合物表视图

| ID# | 名称       | 保留时间   | 峰# | 面积       | 面积%     | 高度     |
|-----|----------|--------|----|----------|---------|--------|
| 1   | RT45.346 | 45.346 | 1  | 32967794 | 64.1862 | 392279 |
| 2   | RT48.517 | 48.517 | 2  | 2537718  | 4.9408  | 39795  |
| 3   | RT57.046 | 57.046 | 3  | 15857258 | 30.8731 | 203465 |

**(S,S)-1,2-bis(3-methoxyphenyl)ethane-1,2-diol (7g)**: (HPLC: Chiracel AS-H, detected at 220 nm, eluent: n-hexane/2-propanol = 93/7, flow rate = 1 mL/min, 25 °C).

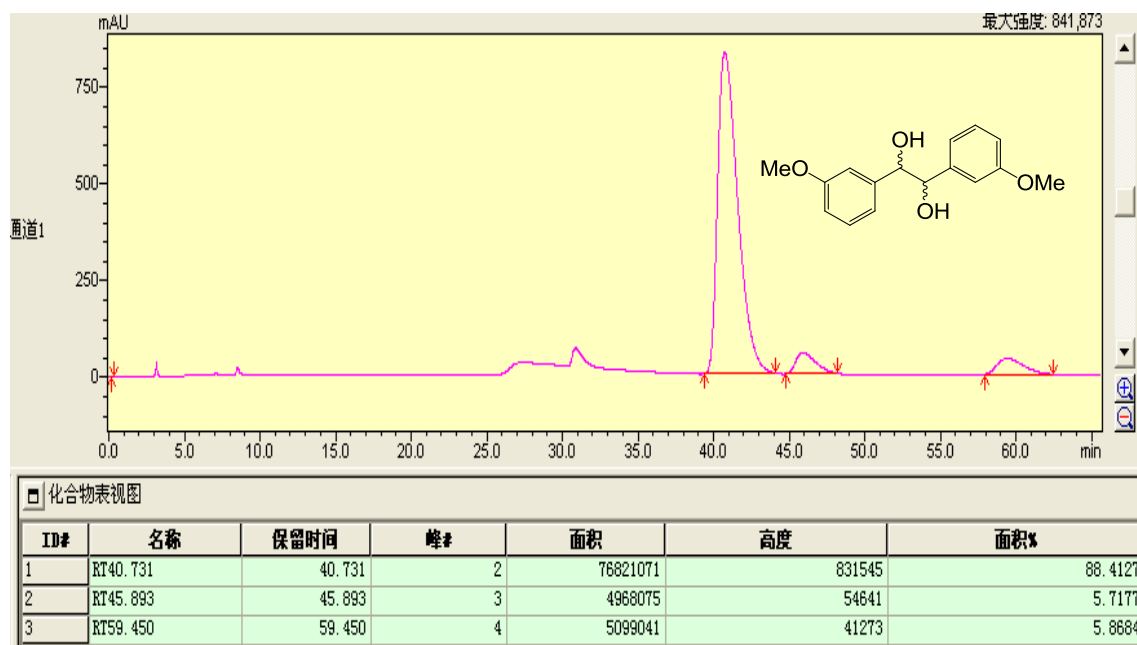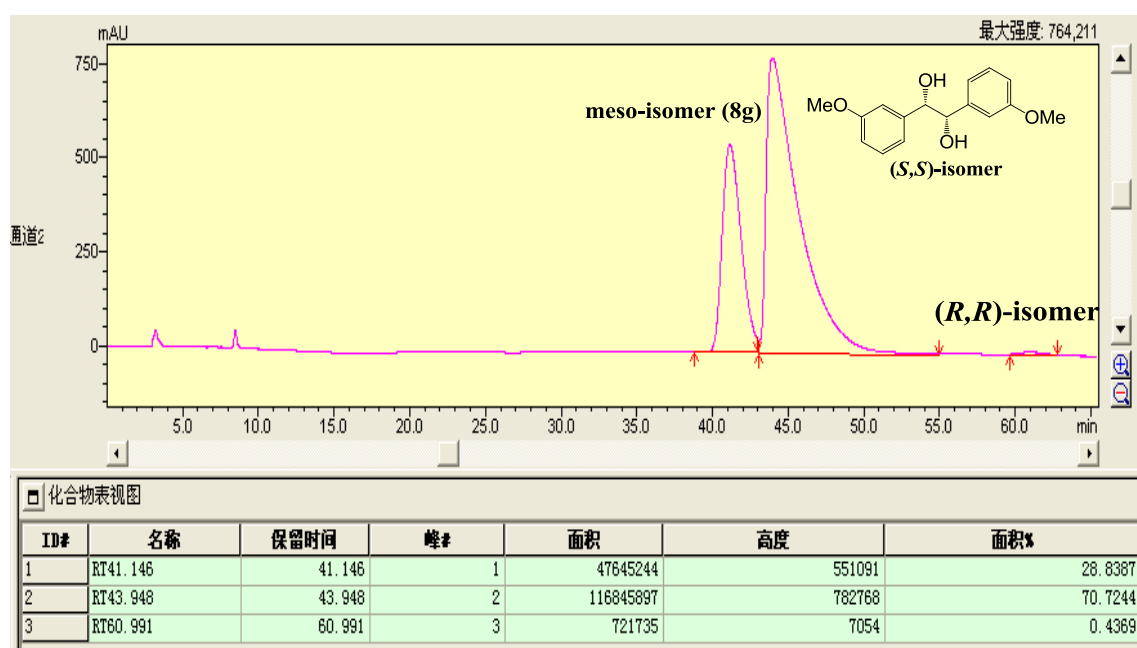

**Table S1.** Reusability of catalyst **5** for transfer hydrogenation of benzil.<sup>[a]</sup>

| Run time                   | 1     | 2     | 3     | 4     | 5     | 6     | 7     | 8     |
|----------------------------|-------|-------|-------|-------|-------|-------|-------|-------|
| % Yield <sup>[b]</sup>     | 99    | 99    | 99    | 97    | 99    | 97    | 99    | 89    |
| <i>dl/meso</i>             | 87/13 | 87/13 | 66/34 | 64/36 | 57/43 | 56/44 | 56/44 | 56/44 |
| % <i>ee</i> <sup>[b]</sup> | 99    | 99    | 99    | 99    | 99    | 99    | 99    | 99    |

[a] Reaction conditions: catalyst **5** (215.0 mg, 20.0  $\mu\text{mol}$  of Rh based on the ICP analysis),  $\text{HCO}_2\text{Na}$  (10.0 mmol), 2-bromo-phenylethanone (2.0 mmol) and 10.0 mL water, reaction temperature (40  $^\circ\text{C}$ ), reaction time (2.0 h). [b] Yields were determined by  $^1\text{H-NMR}$  and *ee* values were determined by chiral HPLC analysis.

**Figure S6.** Reusability of catalyst **5** for asymmetric transfer hydrogenation of benzil. [(HPLC: Chiracel OJ-H, detected at 220 nm, eluent: n-hexane/2-propanol = 90/10, flow rate = 0.5 mL/min, 25  $^\circ\text{C}$ ).

Recycle 1.

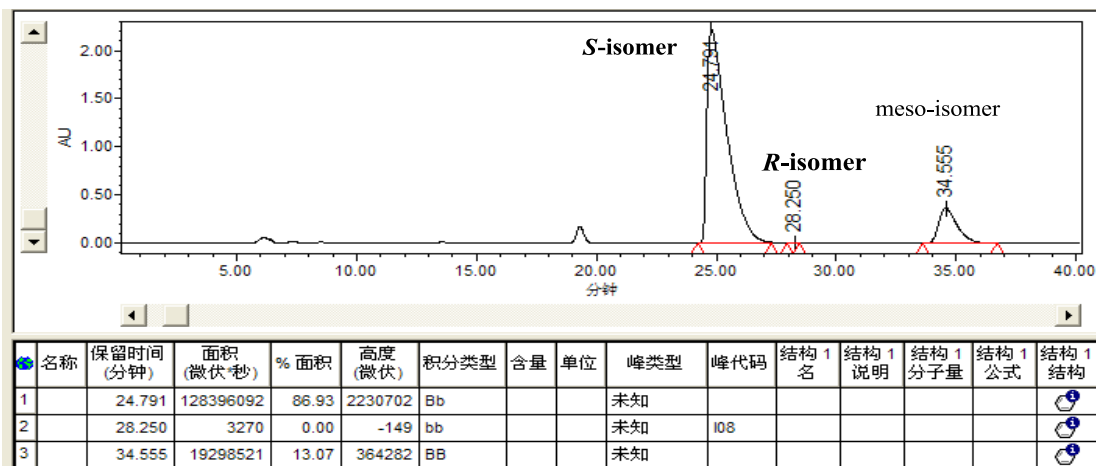

### Recycle 2

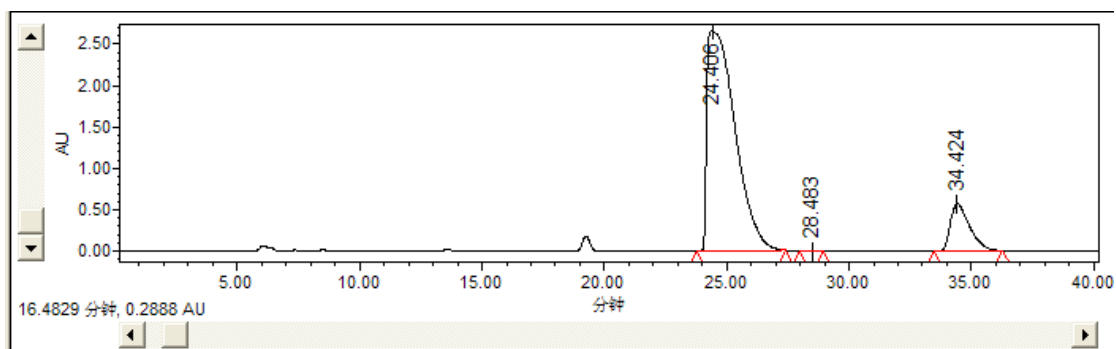

| 名称 | 保留时间 (分钟) | 面积 (微伏秒)  | % 面积  | 高度 (微伏) | 积分类型 | 含量 | 单位 | 峰类型 | 峰代码 | 结构 1 名 | 结构 1 说明 | 结构 1 分子量 | 结构 1 公式 | 结构 1 结构 |
|----|-----------|-----------|-------|---------|------|----|----|-----|-----|--------|---------|----------|---------|---------|
| 1  | 24.406    | 212319779 | 87.13 | 2655656 | bb   |    |    | 未知  |     |        |         |          |         |         |
| 2  | 28.483    | 27536     | 0.01  | -893    | bb   |    |    | 未知  | 108 |        |         |          |         |         |
| 3  | 34.424    | 31344392  | 12.86 | 574260  | bb   |    |    | 未知  |     |        |         |          |         |         |

### Recycle 3

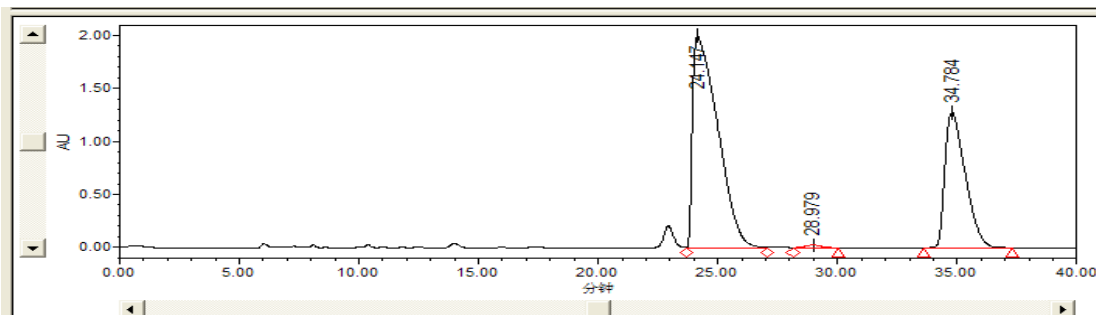

| 名称 | 保留时间 (分钟) | 面积 (微伏秒)  | % 面积  | 高度 (微伏) | 积分类型 | 含量 | 单位 | 峰类型 | 峰代码 | 结构 1 名 | 结构 1 说明 | 结构 1 分子量 | 结构 1 公式 | 结构 1 结构 |
|----|-----------|-----------|-------|---------|------|----|----|-----|-----|--------|---------|----------|---------|---------|
| 1  | 24.147    | 146567121 | 65.68 | 1996941 | VV   |    |    | 未知  |     |        |         |          |         |         |
| 2  | 28.979    | 1132633   | 0.51  | 25450   | VB   |    |    | 未知  |     |        |         |          |         |         |
| 3  | 34.784    | 75449406  | 33.81 | 1279952 | BB   |    |    | 未知  |     |        |         |          |         |         |

### Recycle 4

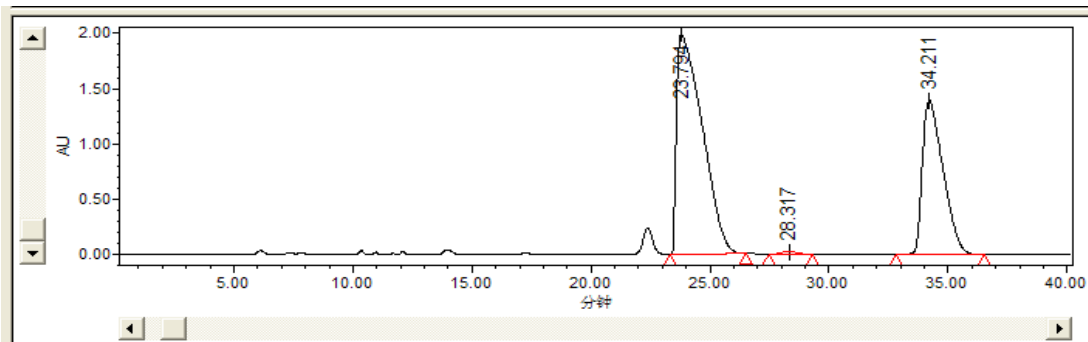

| 名称 | 保留时间 (分钟) | 面积 (微伏秒)  | % 面积  | 高度 (微伏) | 积分类型 | 含量 | 单位 | 峰类型 | 峰代码 | 结构 1 名 | 结构 1 说明 | 结构 1 分子量 | 结构 1 公式 | 结构 1 结构 |
|----|-----------|-----------|-------|---------|------|----|----|-----|-----|--------|---------|----------|---------|---------|
| 1  | 23.794    | 148819972 | 63.54 | 1988376 | BB   |    |    | 未知  |     |        |         |          |         |         |
| 2  | 28.317    | 1165689   | 0.50  | 25548   | BB   |    |    | 未知  |     |        |         |          |         |         |
| 3  | 34.211    | 84221410  | 35.96 | 1394400 | BB   |    |    | 未知  |     |        |         |          |         |         |

### Recycle 5

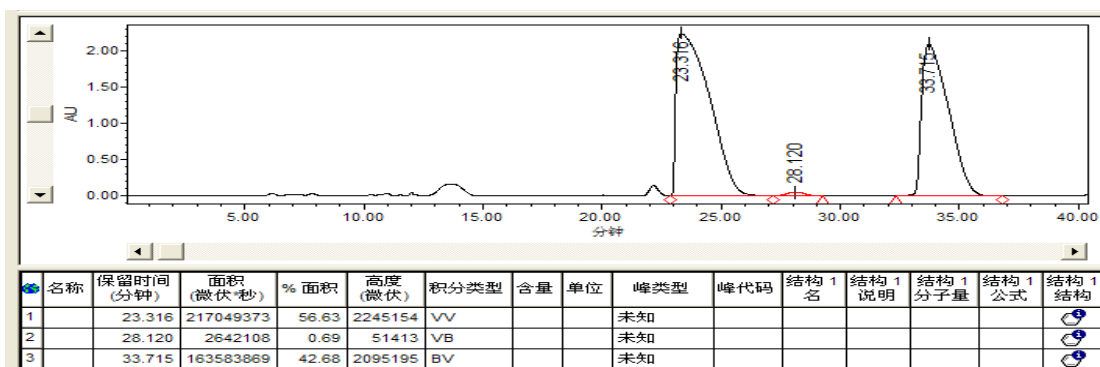

### Recycle 6

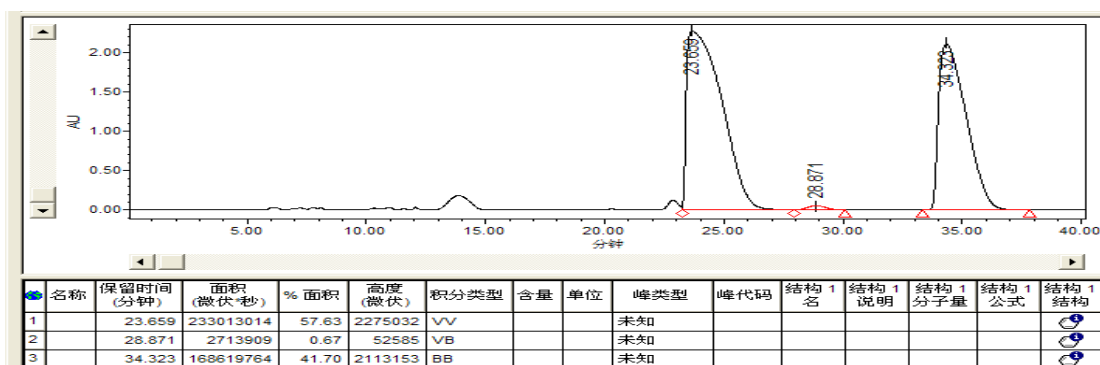

### Recycle 7

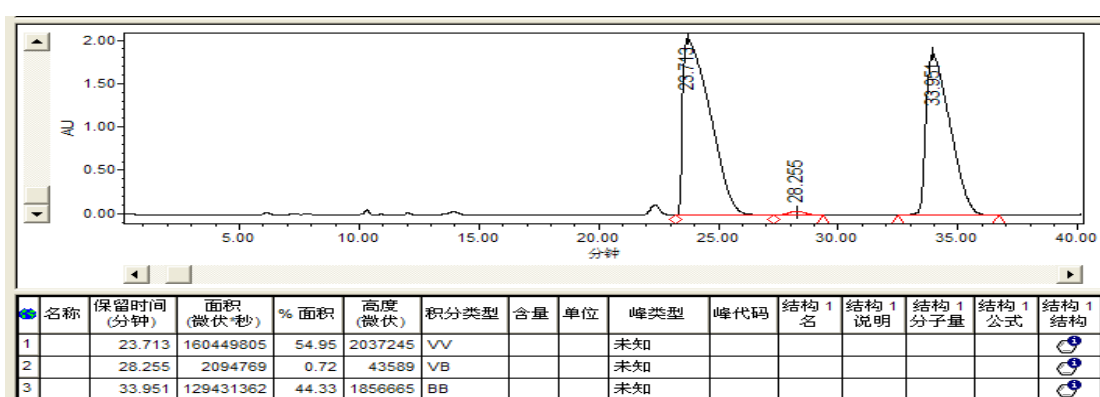

### Recycle 8

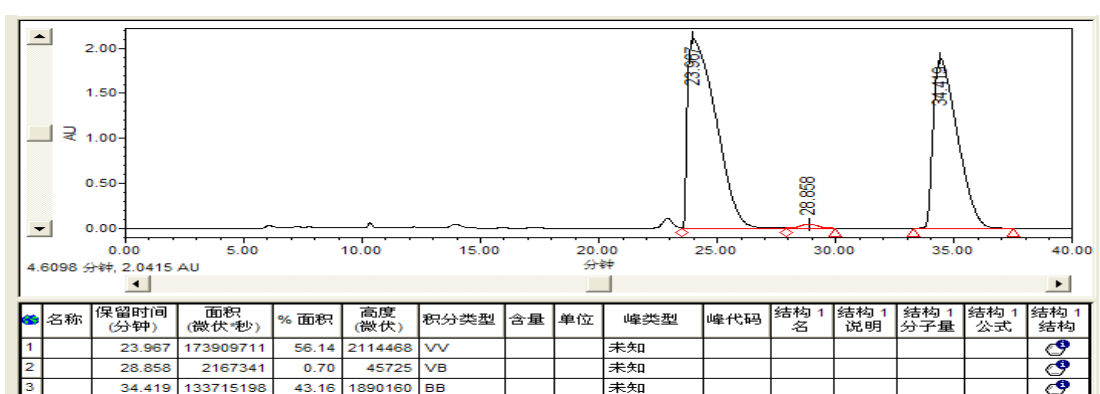

Supplement: c6gc01589a1.pdf [file c6gc01589a1.pdf]
